# Supplementary material for: Synthesis and biological evaluation of novel D-ring fused steroidal N(2)-substituted-1,2,3-triazoles
Source: Royal Society of Chemistry journal article supplement (doi:10.1039/d4md00297k), 2024-10-18
Supplement: d4md00297k1.pdf [file d4md00297k1.pdf]

## SUPPLEMENTARY DATA

### Synthesis and biological evaluation of novel D-ring fused steroidal *N*(2)-substituted-1,2,3-triazoles

Branislava Tenjović<sup>a</sup>, Sofija Bekić<sup>a\*</sup>, Andjelka Ćelić<sup>b</sup>, Edward Petri<sup>b</sup>, Julia Scholda<sup>c</sup>, Florian Kopp<sup>c\*</sup>, Marija Sakač<sup>a</sup>, Andrea Nikolić<sup>a</sup>

<sup>a</sup> *Department of Chemistry, Biochemistry and Environmental Protection, Faculty of Sciences, University of Novi Sad, Trg Dositeja Obradovića 3, 21000 Novi Sad, Serbia*

<sup>b</sup> *Department of Biology and Ecology, Faculty of Sciences, University of Novi Sad, Trg Dositeja Obradovića 2, 21000 Novi Sad, Serbia*

<sup>c</sup> *Faculty of Life Sciences, Department of Pharmaceutical Sciences, Clinical Pharmacy Group, University of Vienna, Josef-Holaubek-Platz 2, 1090, Vienna, Austria*

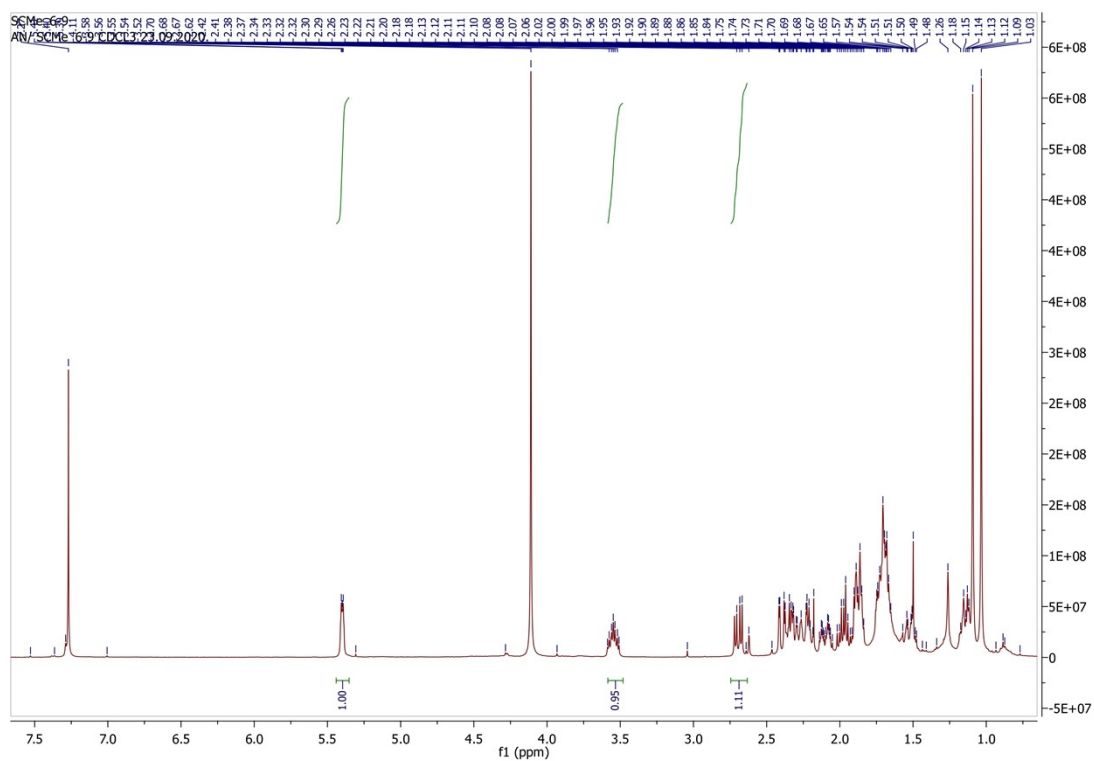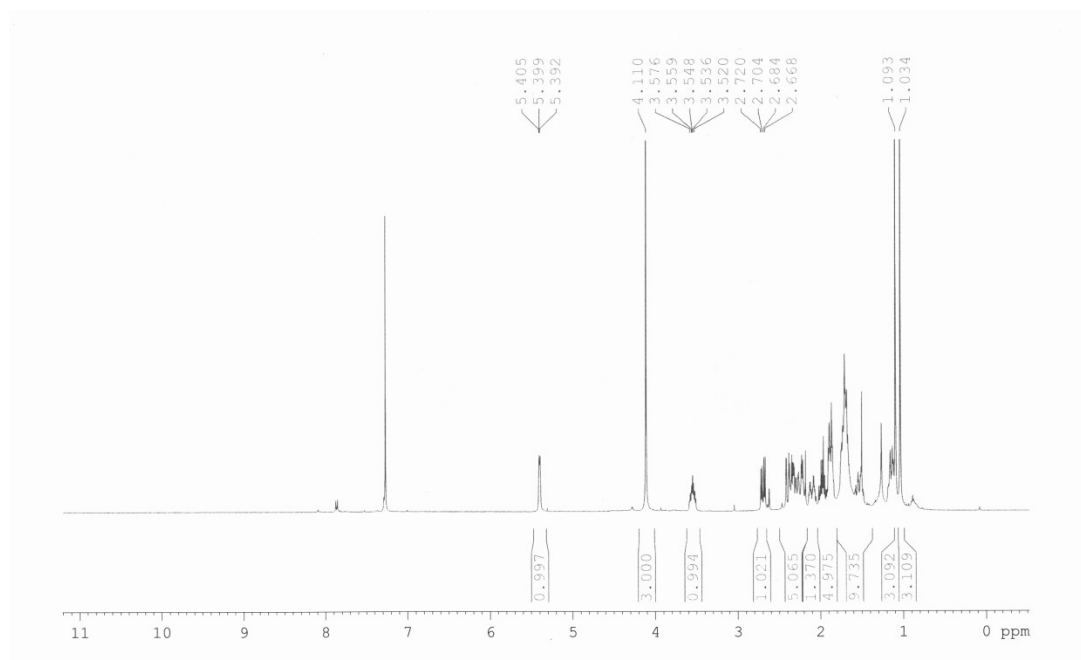

**Fig S1.**  $^1\text{H}$  NMR of compound **3a**

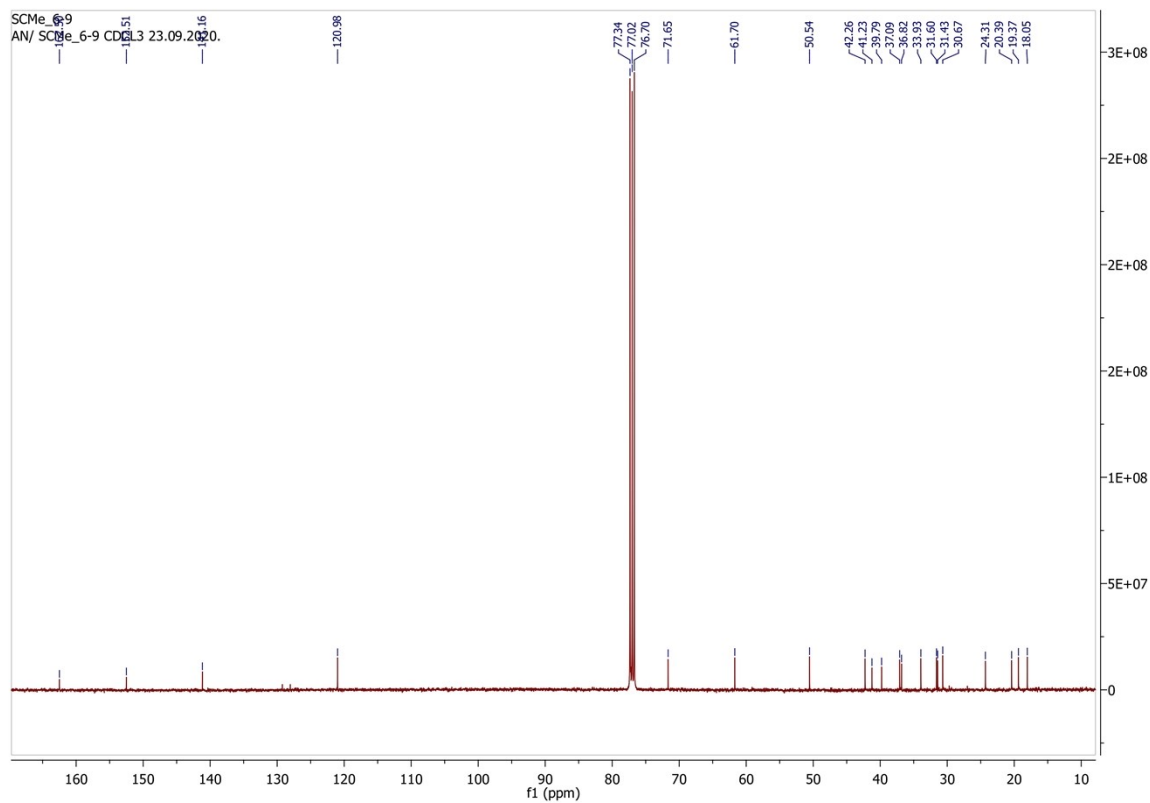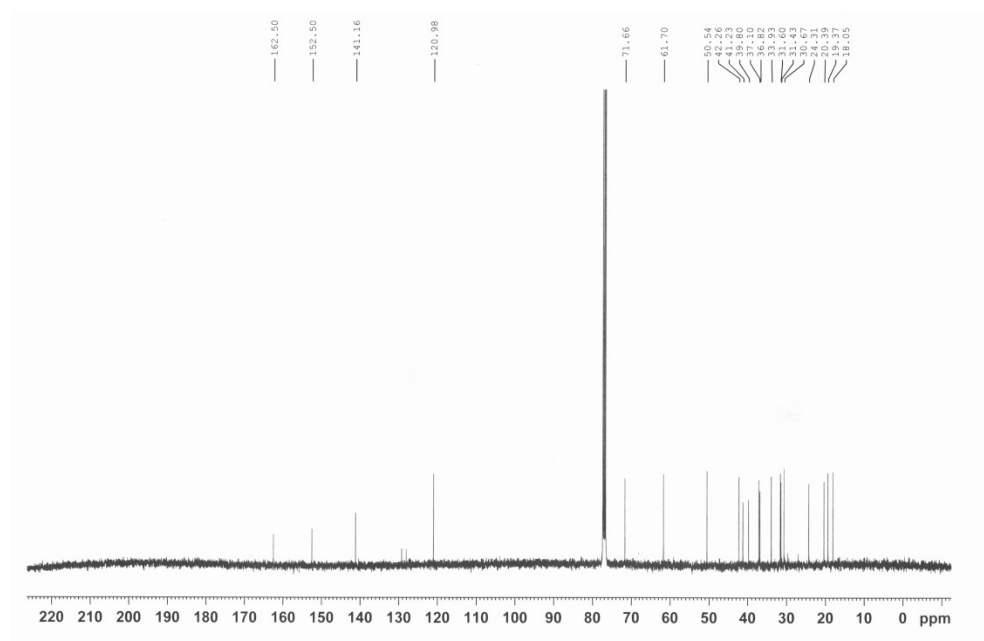

**Fig S2.**  $^{13}\text{C}$  NMR of compound **3a**

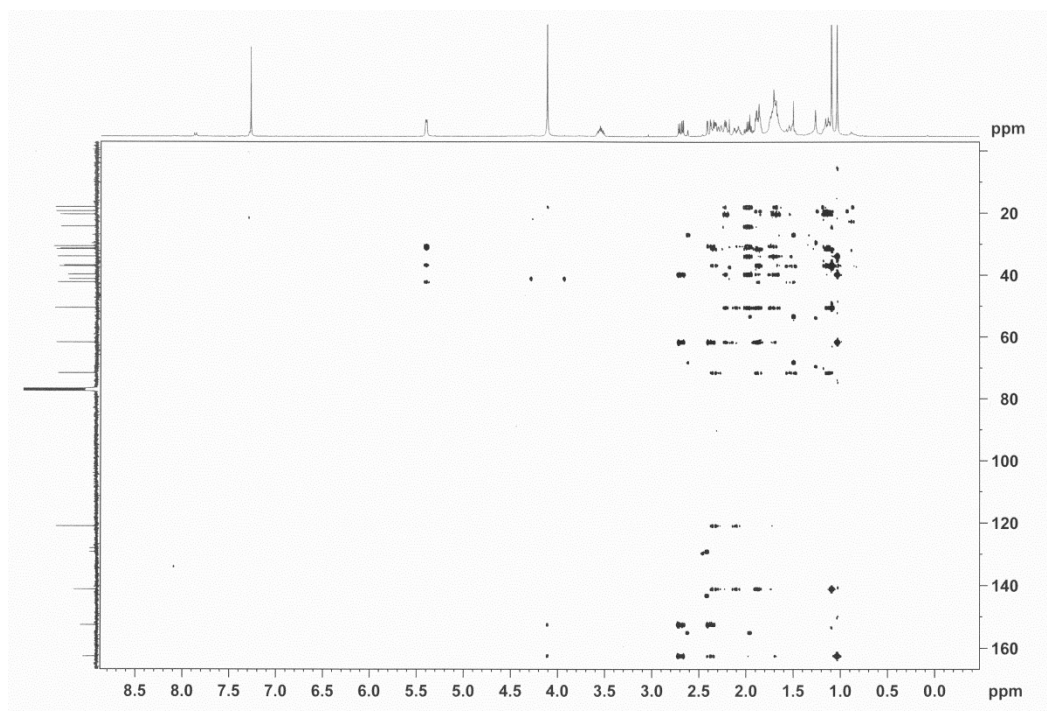

**Fig S3.**  $^1\text{H}$ - $^{13}\text{C}$  HMBC of compound **3a**

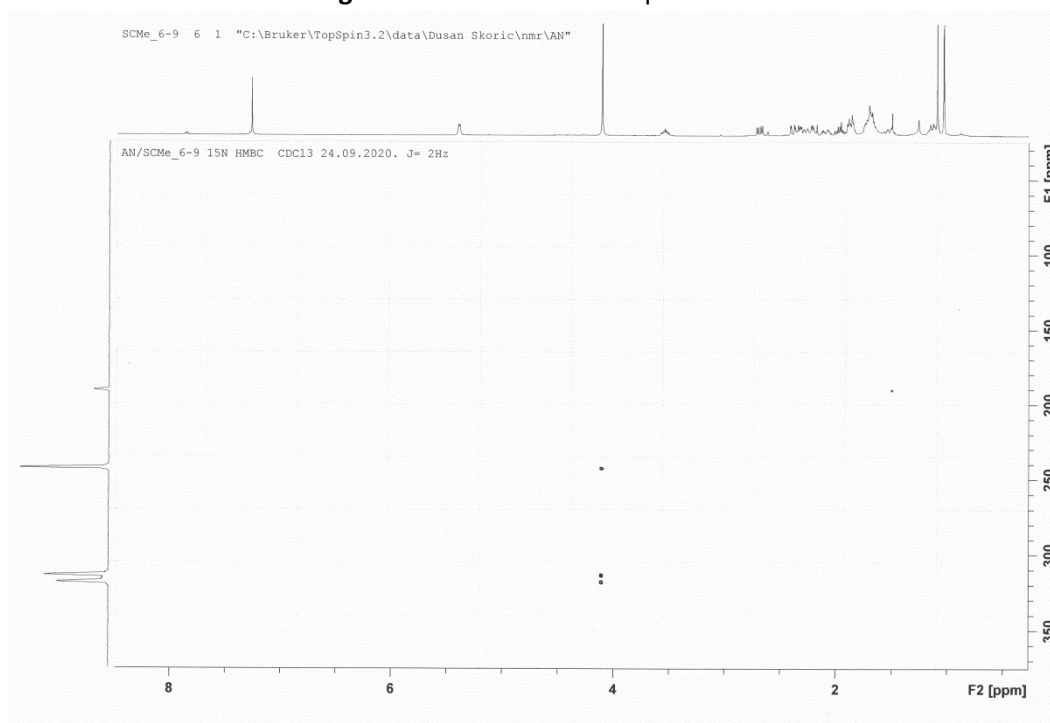

**Fig S4.**  $^1\text{H}$ - $^{15}\text{N}$  HMBC of compound **3a**



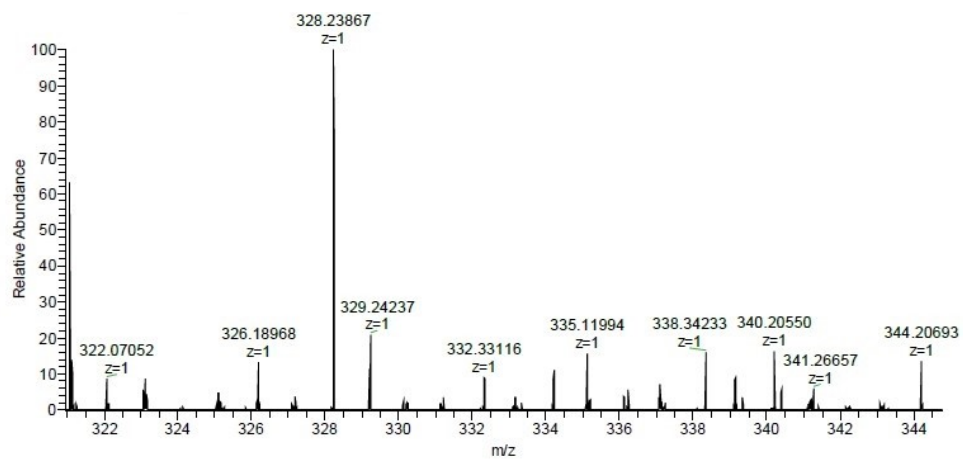

**Fig S5.** HRMS of compound **3a**



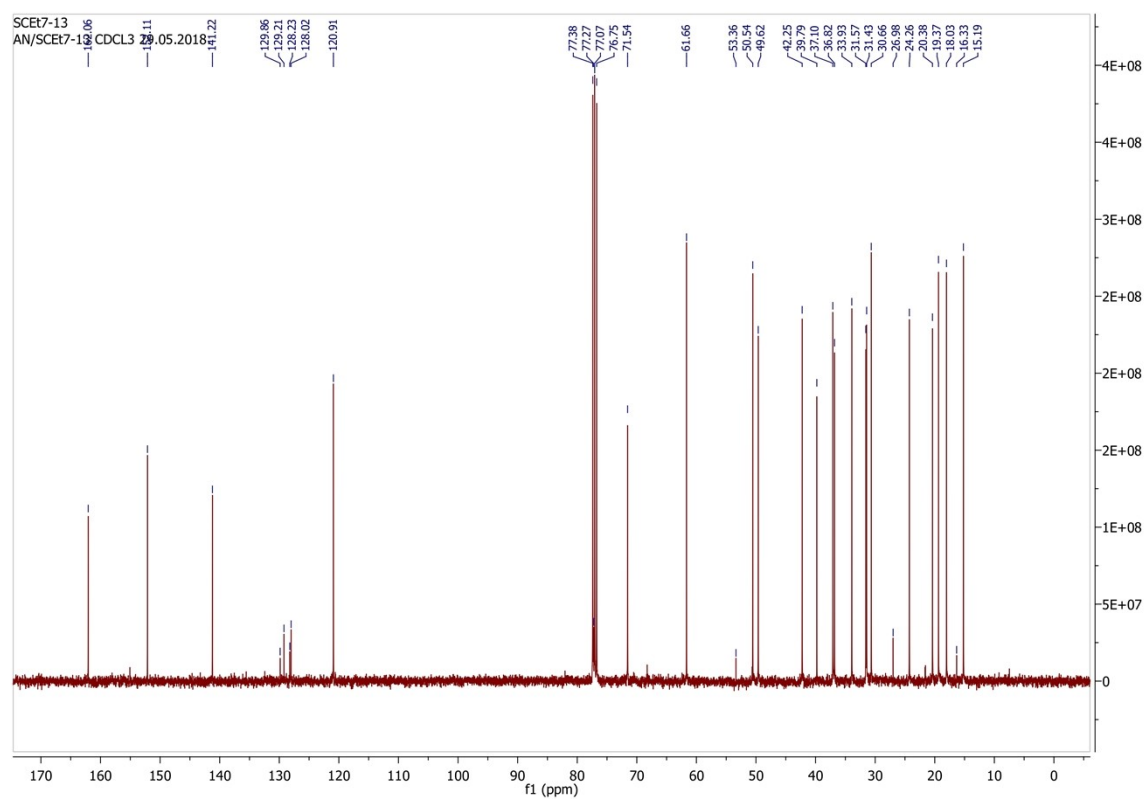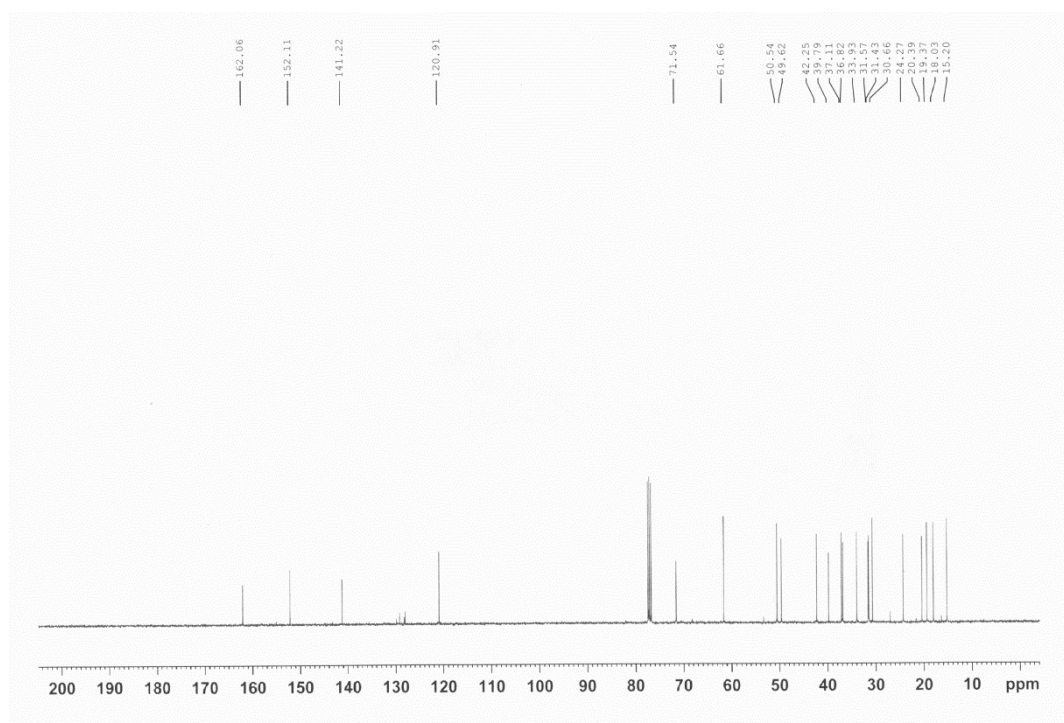

**Fig S7.**  $^{13}\text{C}$  NMR of compound **3b**

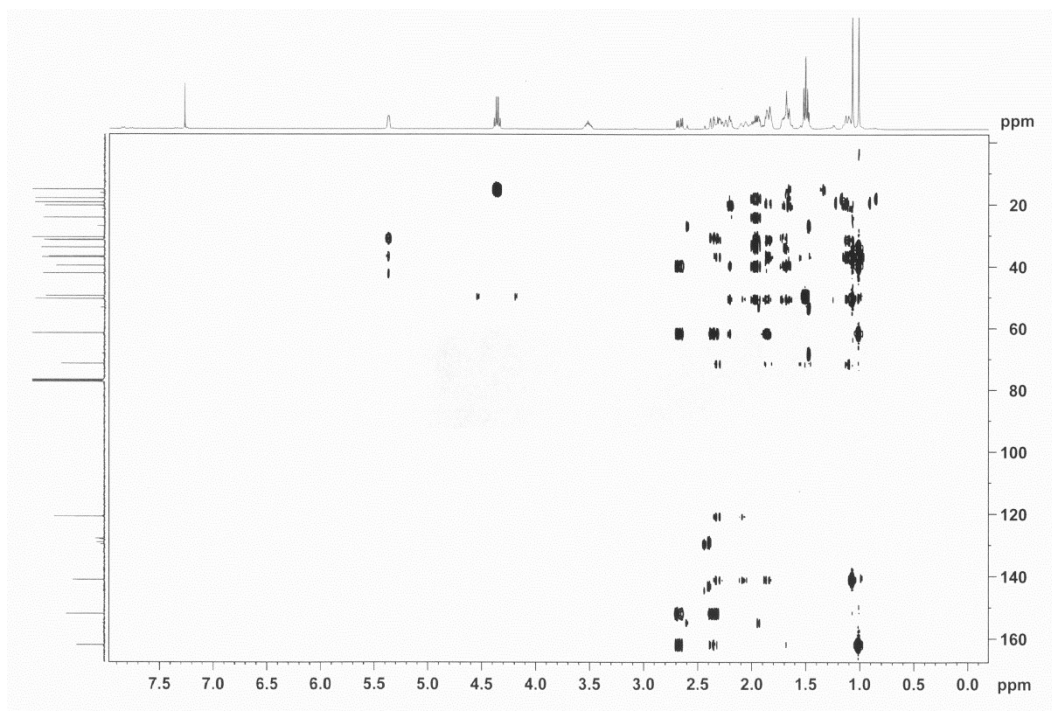

**Fig S8.**  $^1\text{H}$ - $^{13}\text{C}$  HMBC of compound **3b**

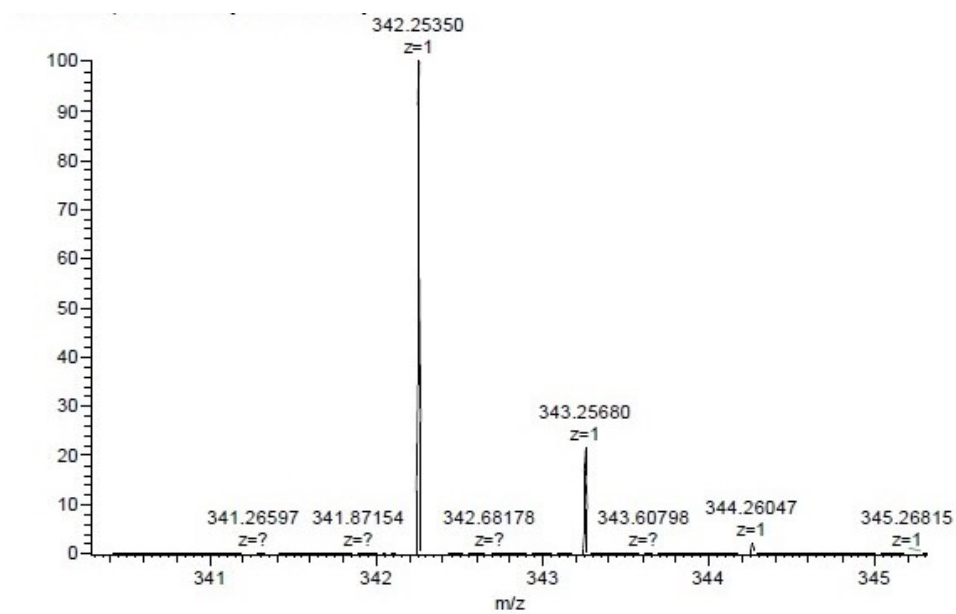

**Fig S9.** HRMS of compound **3b**

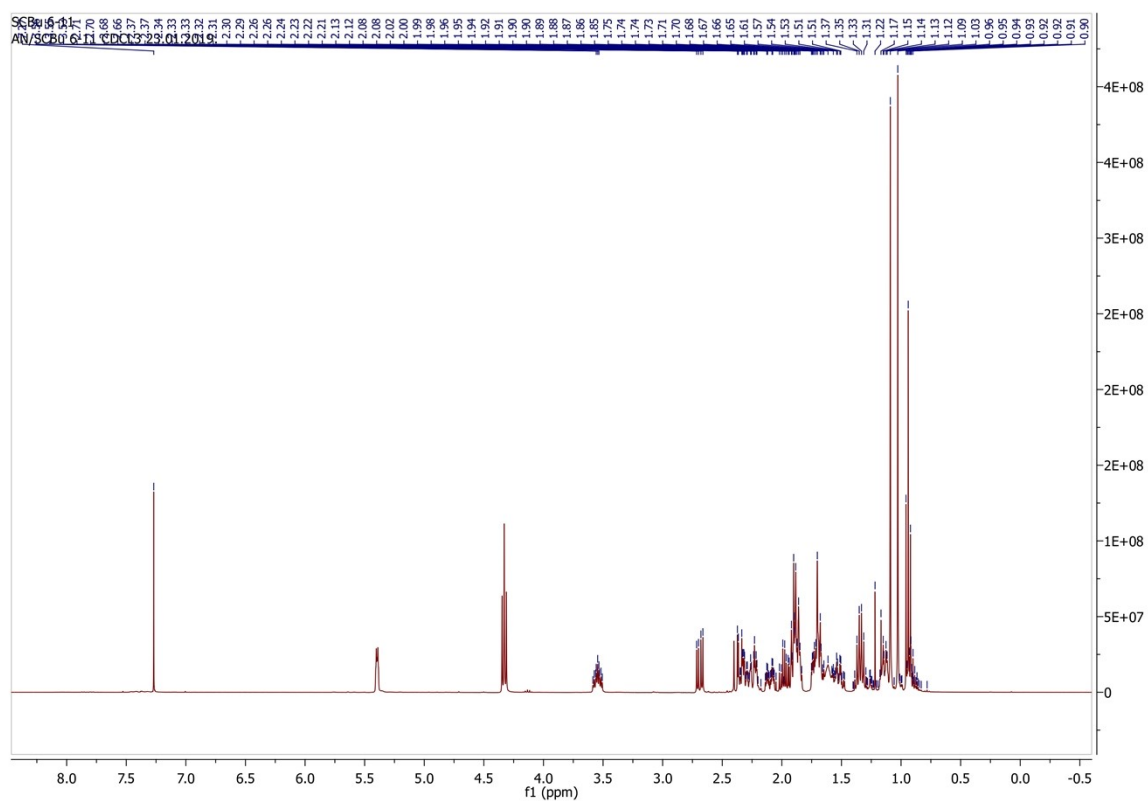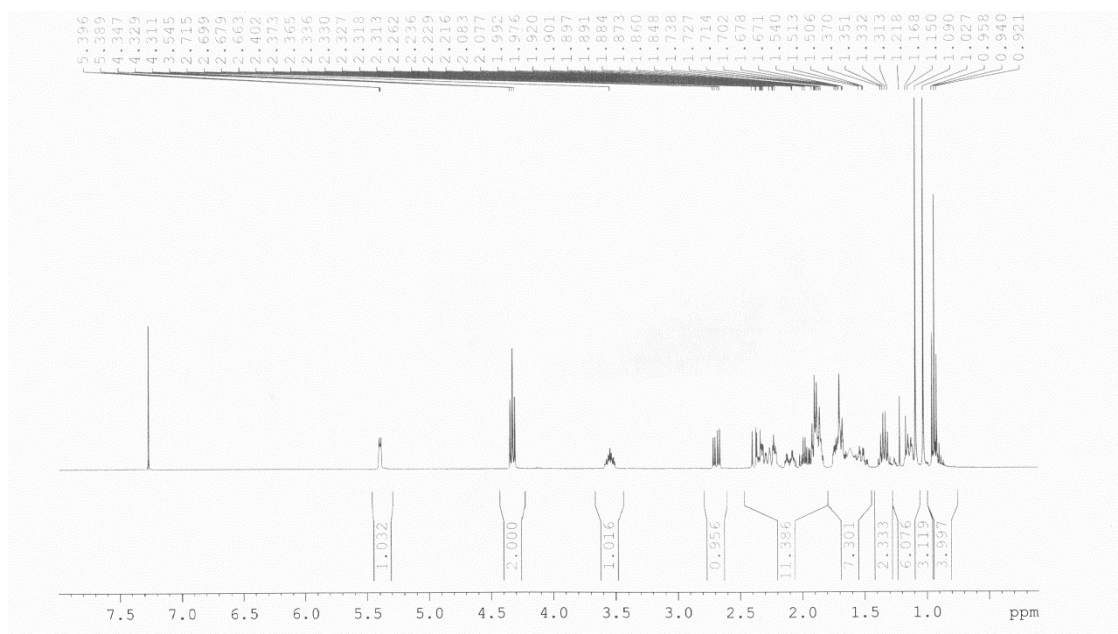

**Fig S10.**  $^1\text{H}$  MNR of compound **3c**



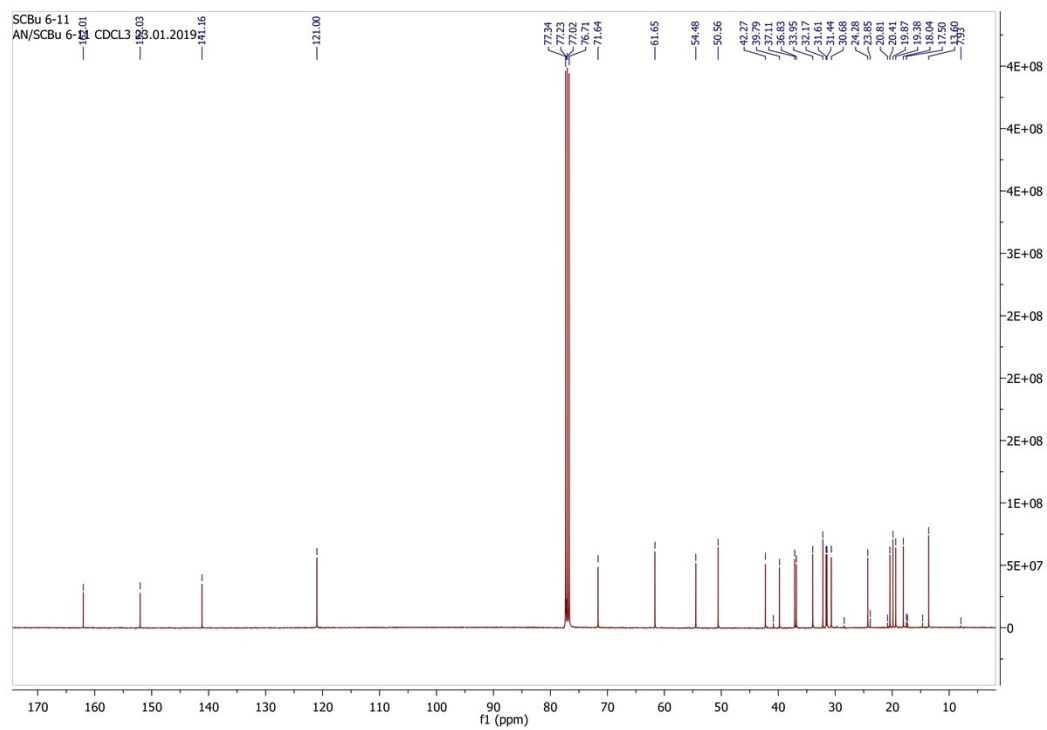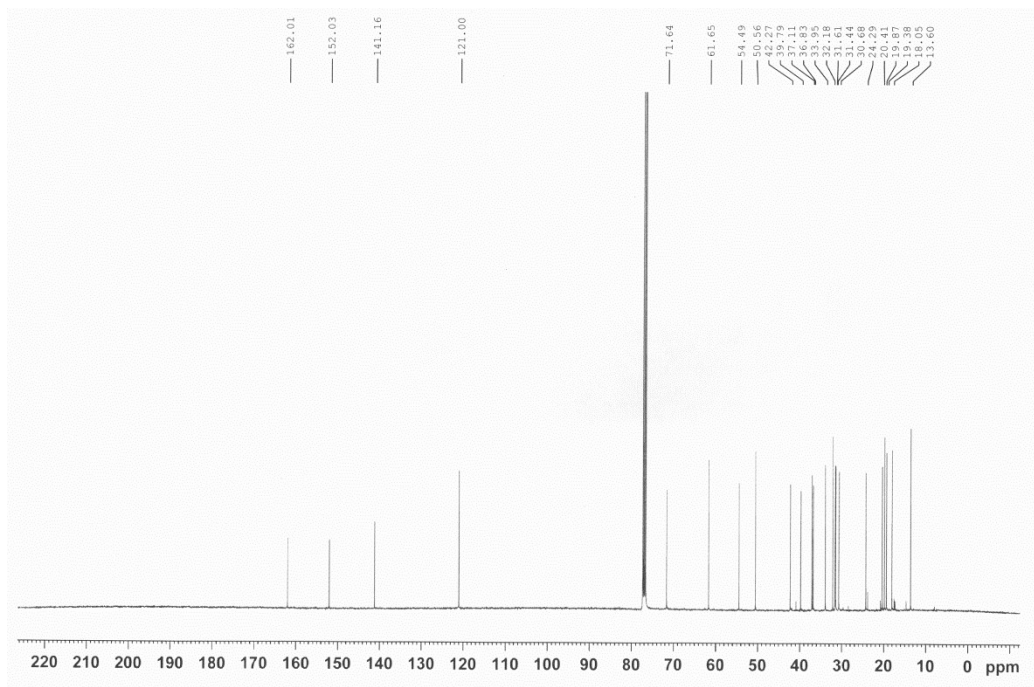

**Fig S11.** <sup>13</sup>C NMR of compound **3c**

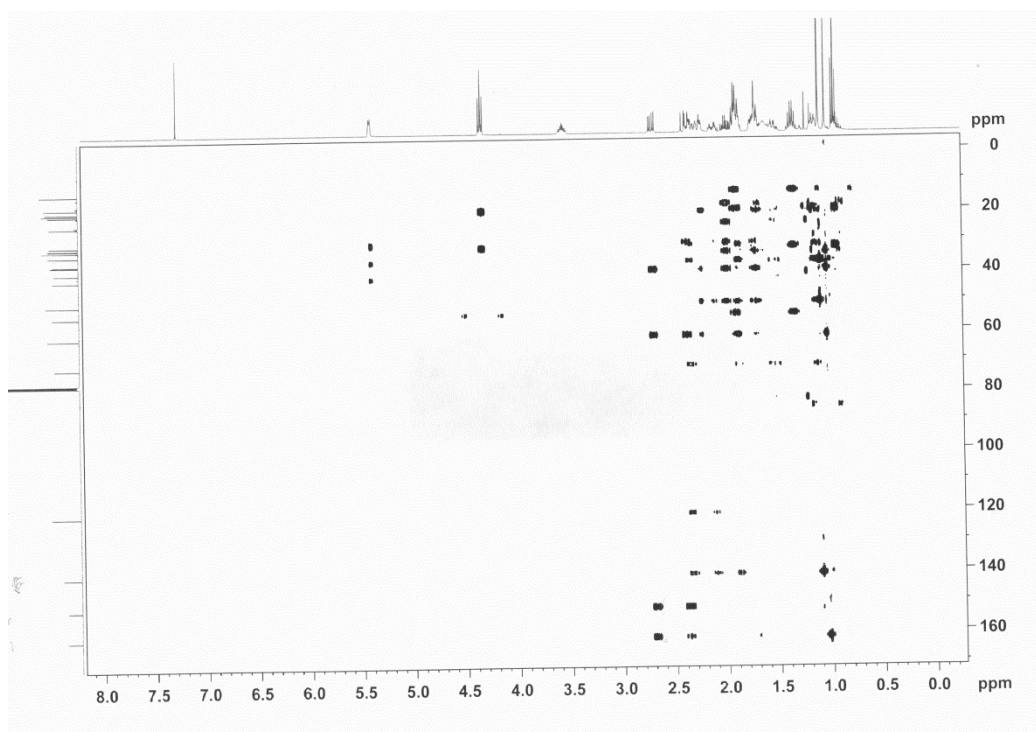

**Fig S12.**  $^1\text{H}$ - $^{13}\text{C}$  HMBC of compound **3c**

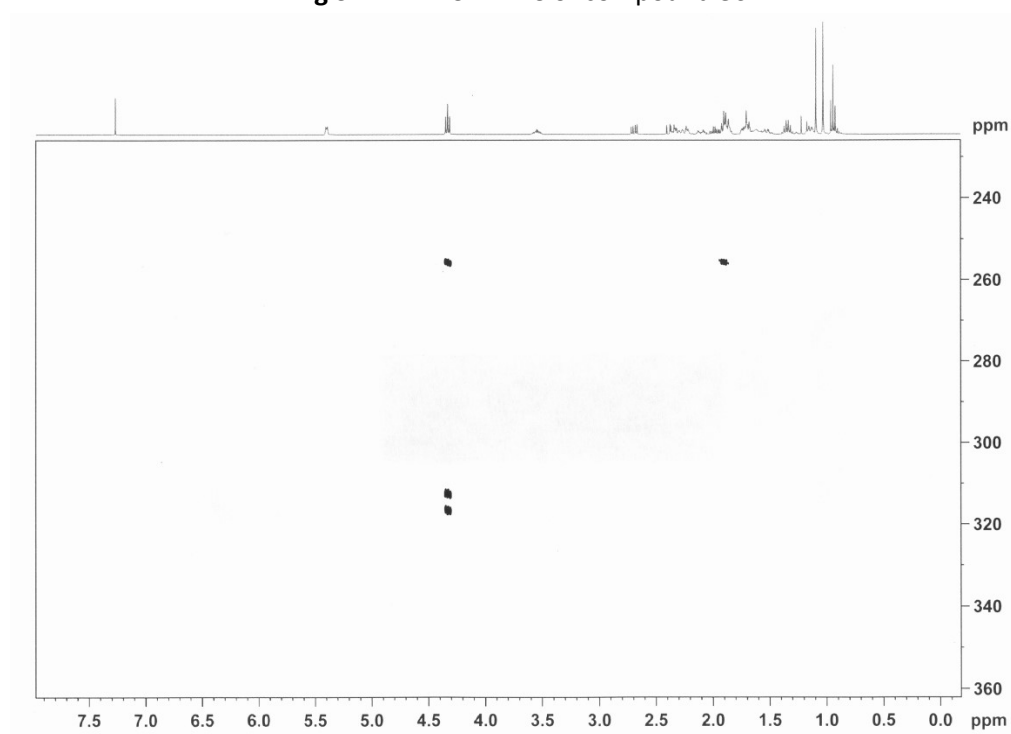

**Fig S13.**  $^1\text{H}$ - $^{15}\text{N}$  HMBC of compound **3c**

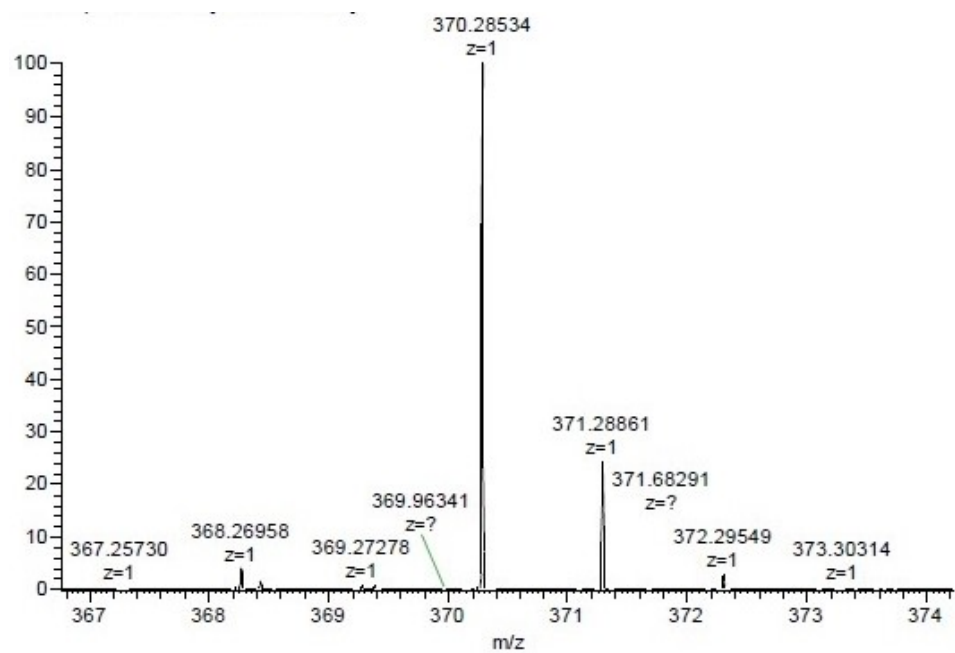

**Fig S14.** HRMS of compound **3c**



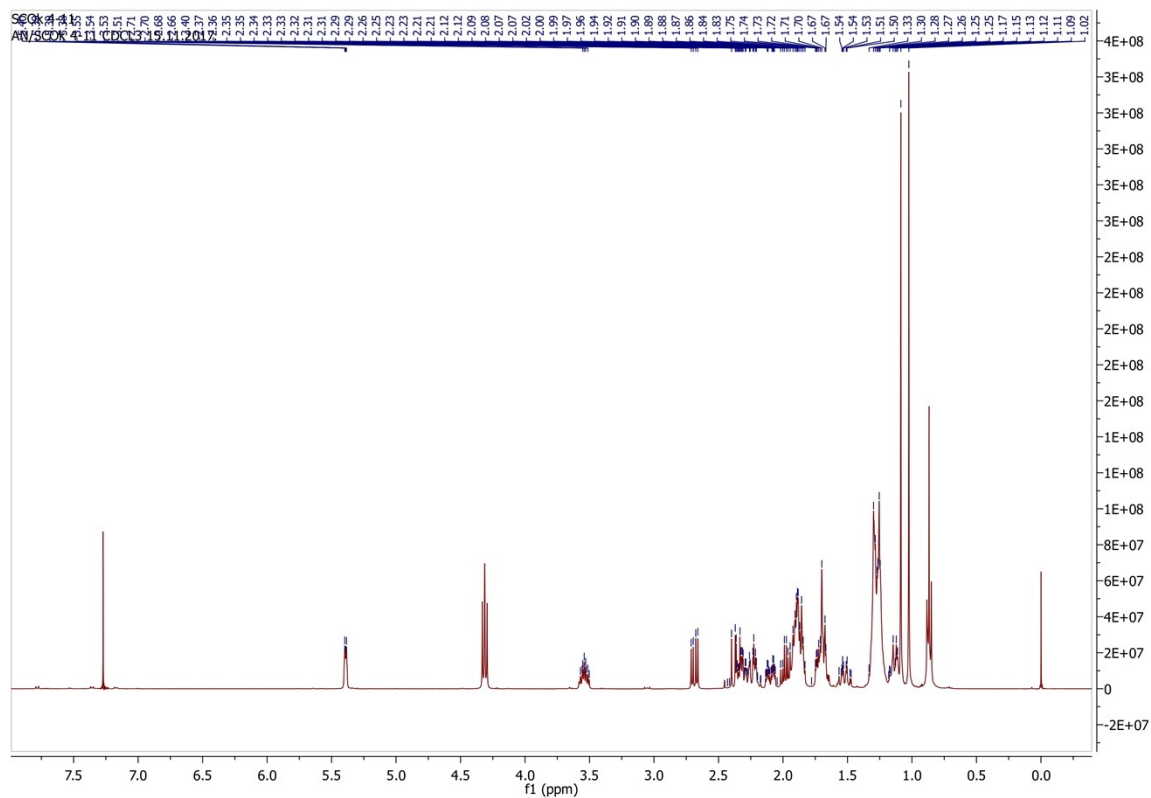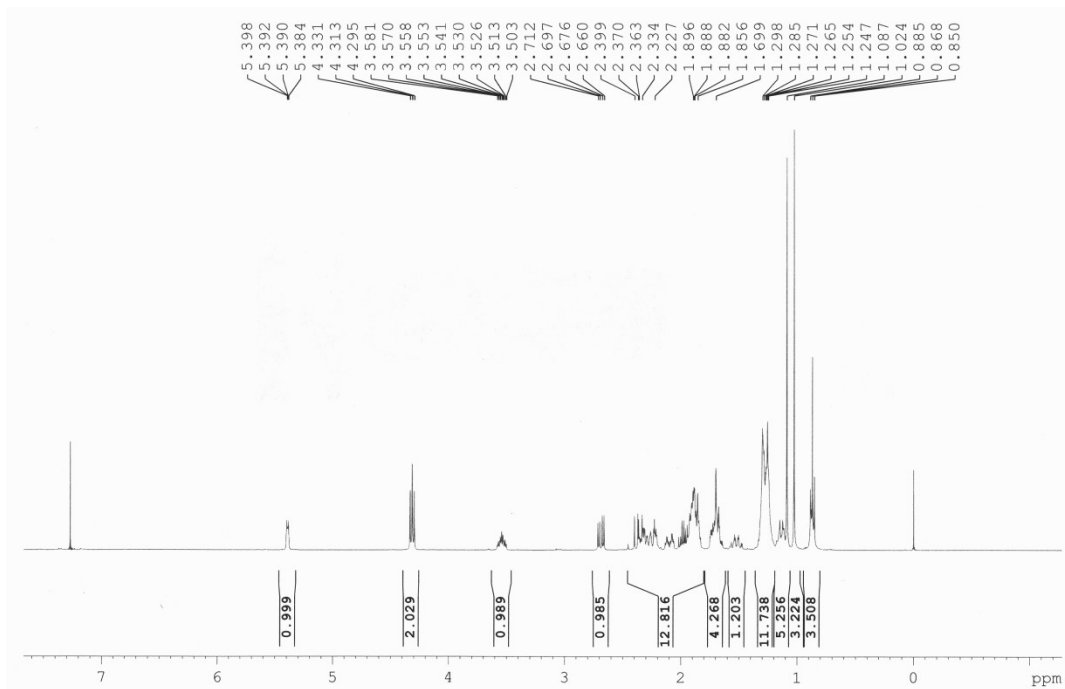

Fig S15. <sup>1</sup>H NMR of compound 3d

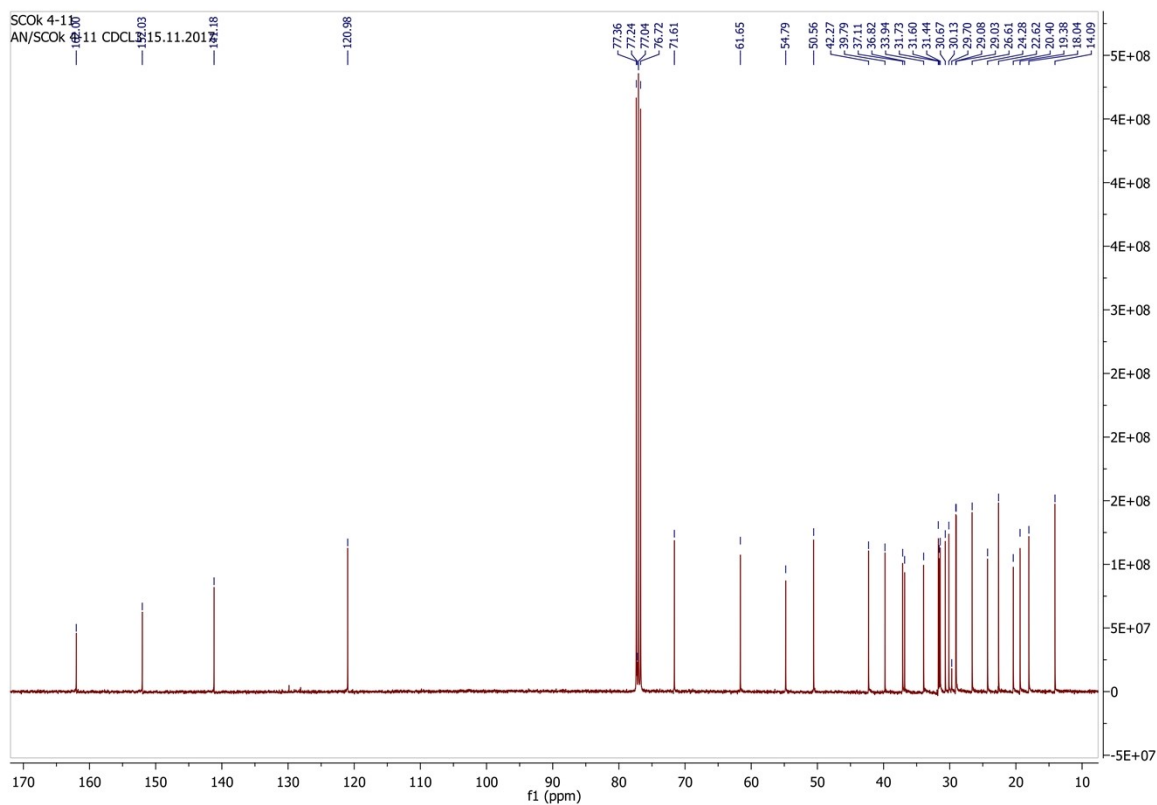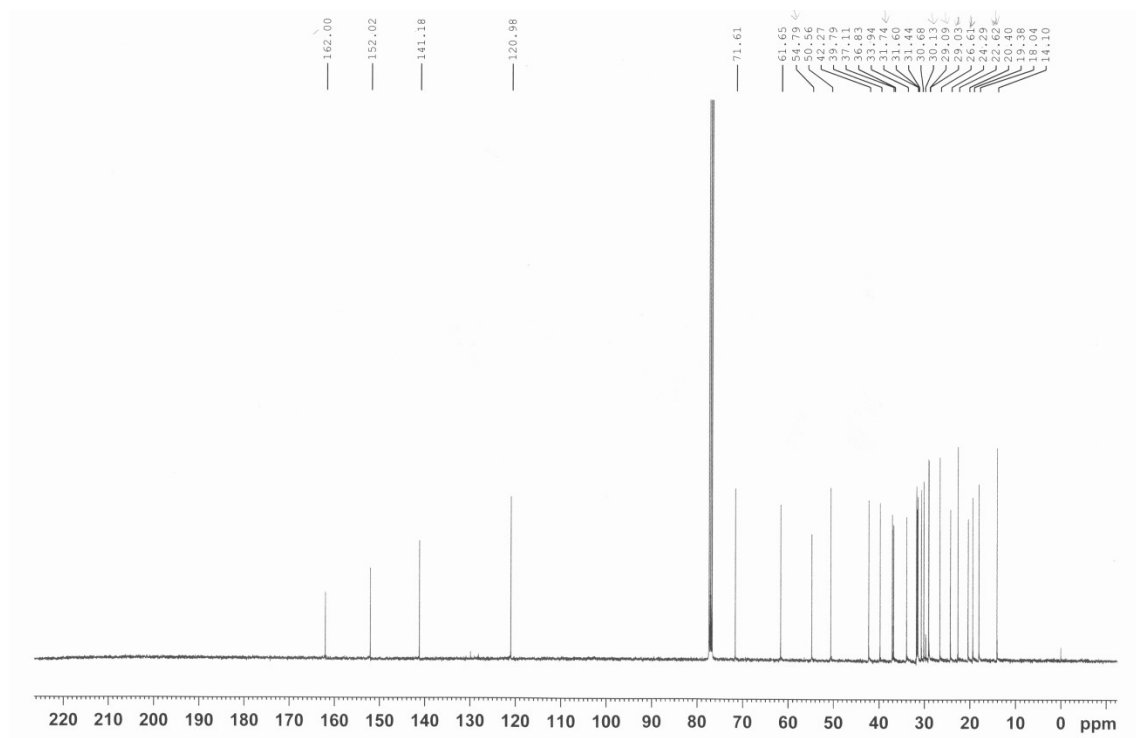

**Fig S16.** <sup>13</sup>C NMR of compound **3d**

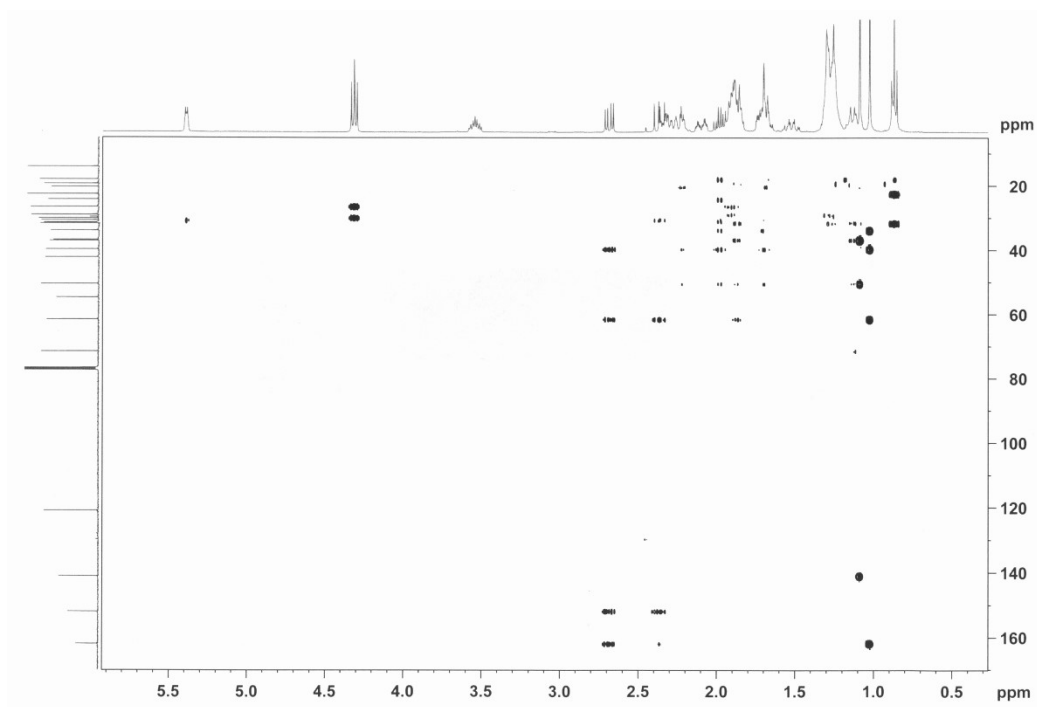

**Fig S17.**  $^1\text{H}$ - $^{13}\text{C}$  HMBC of compound **3d**

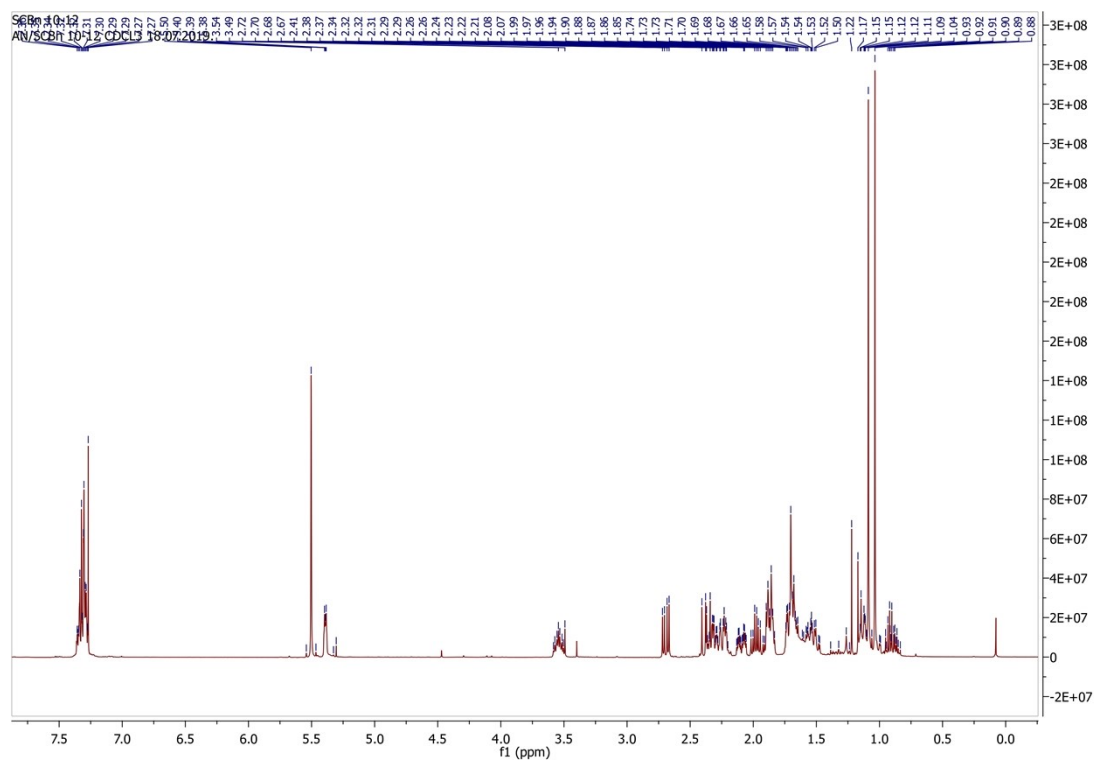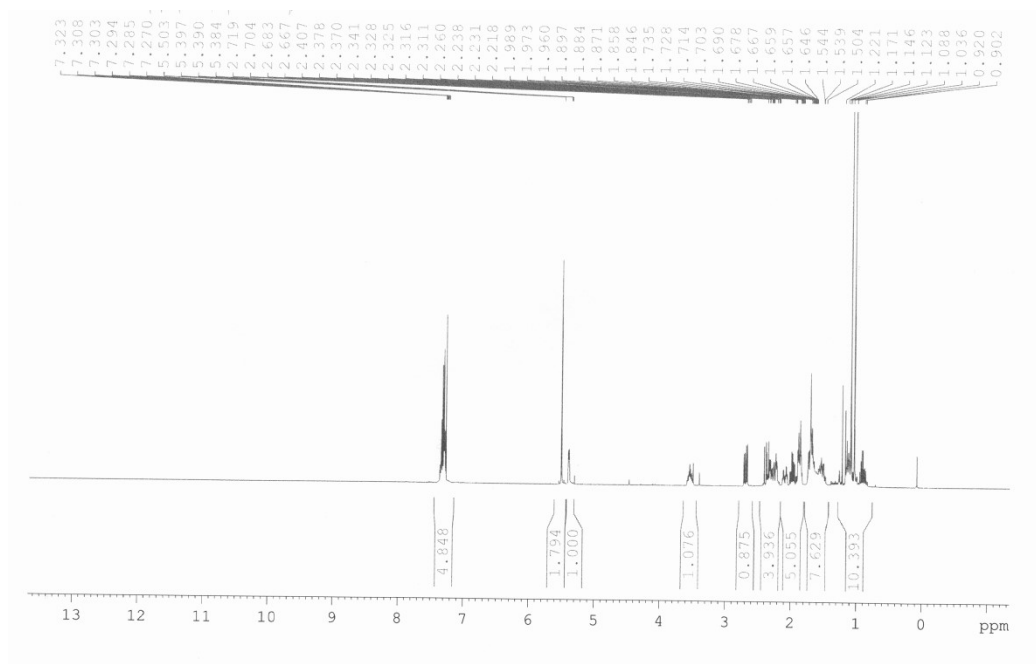

Fig S18. <sup>1</sup>H NMR of compound **3e**

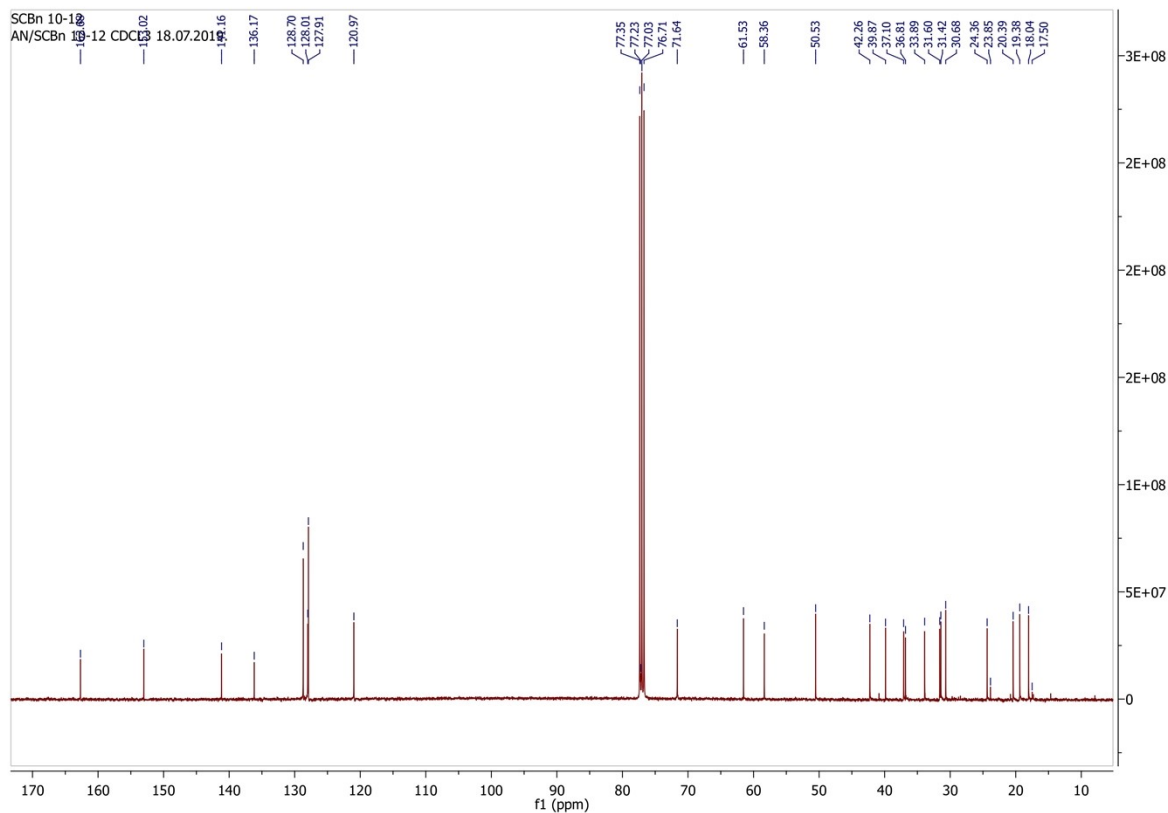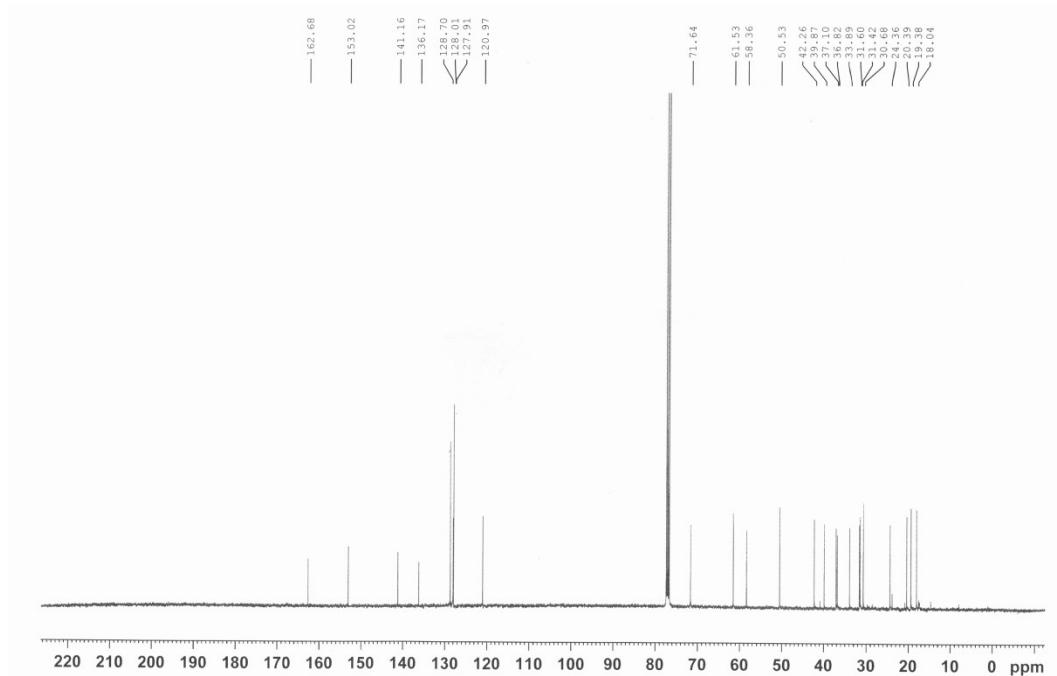

Fig S19. <sup>13</sup>C NMR of compound **3e**

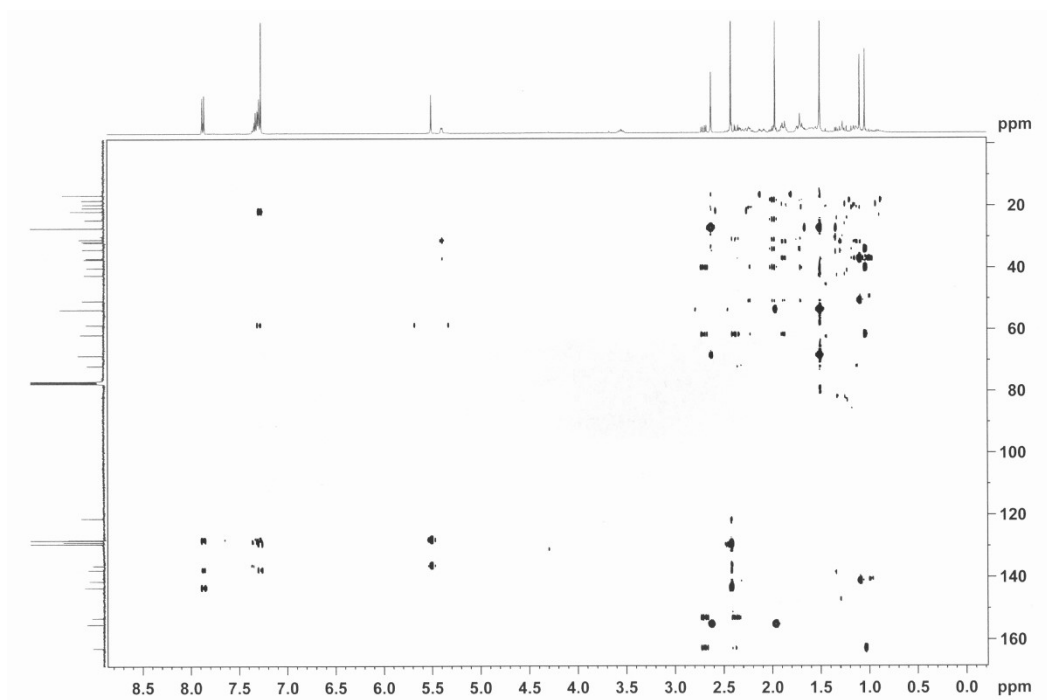

**Fig S20.**  $^1\text{H}$ - $^{13}\text{C}$  HMBC of compound **3e**

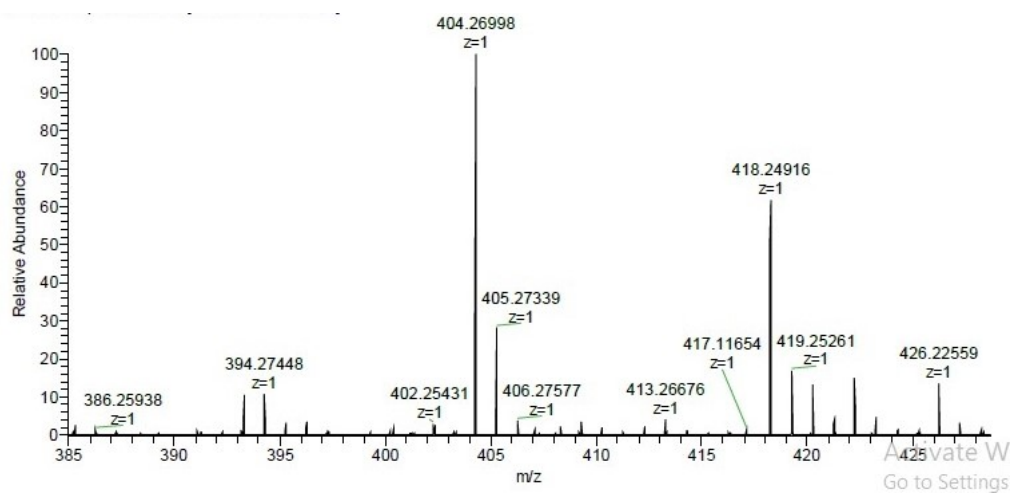

**Fig S21.** HRMS of compound **3e**

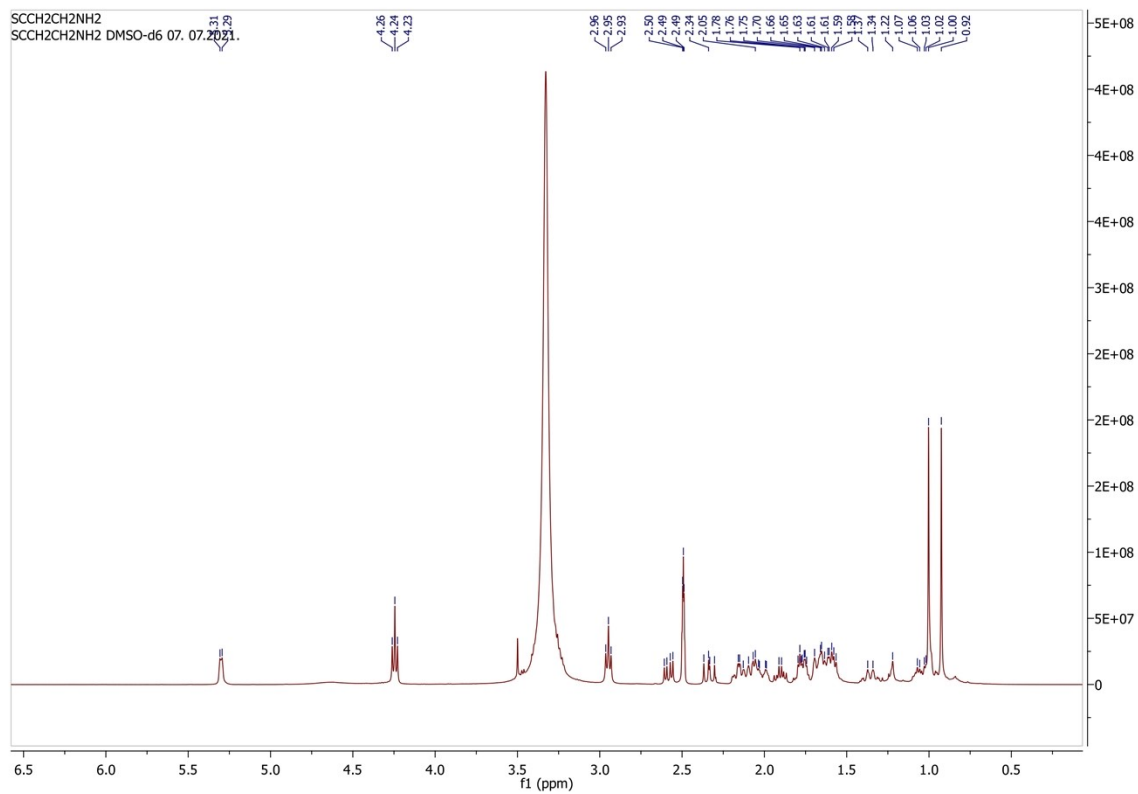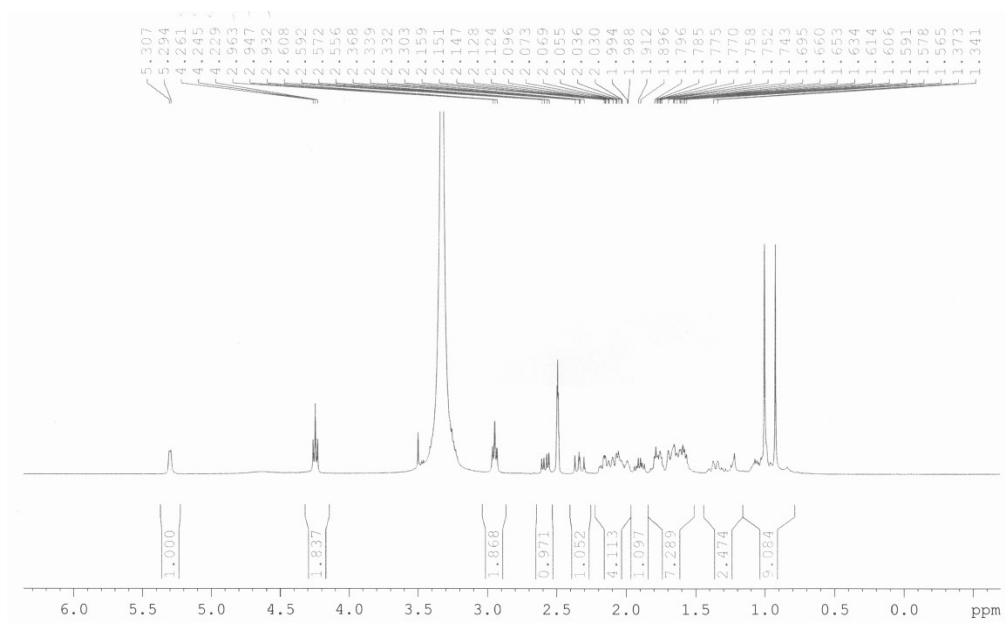

**Fig S22.**  $^1\text{H}$  NMR of compound **3f**

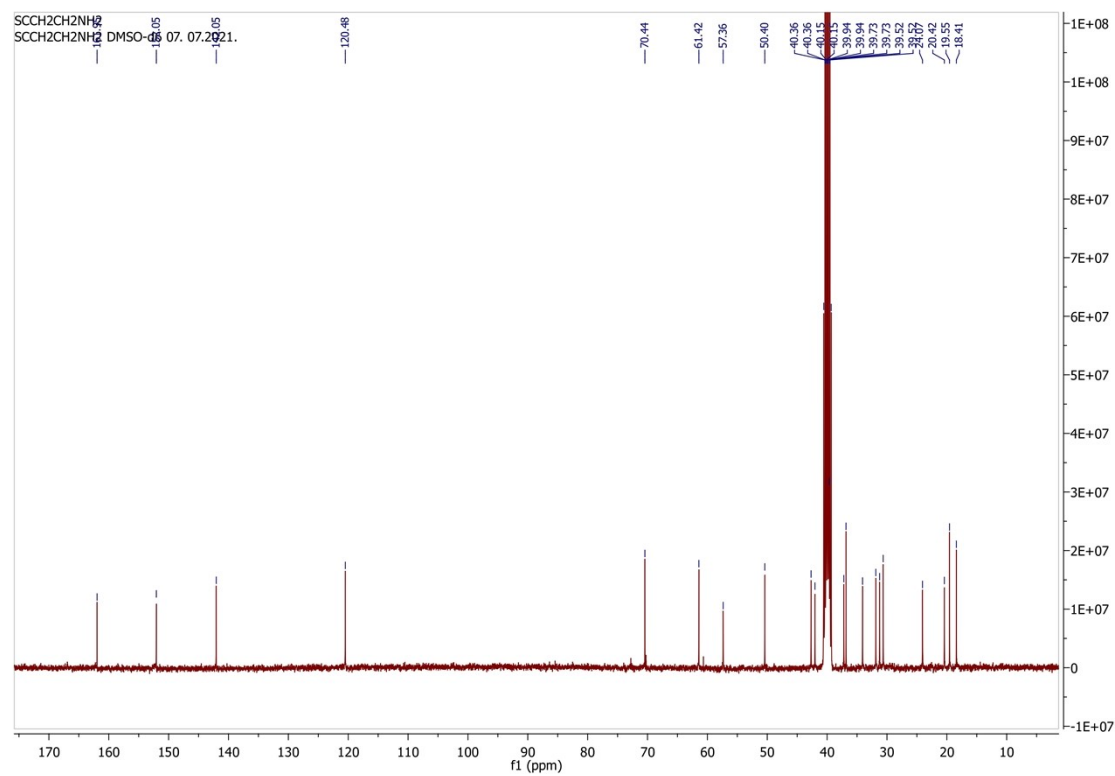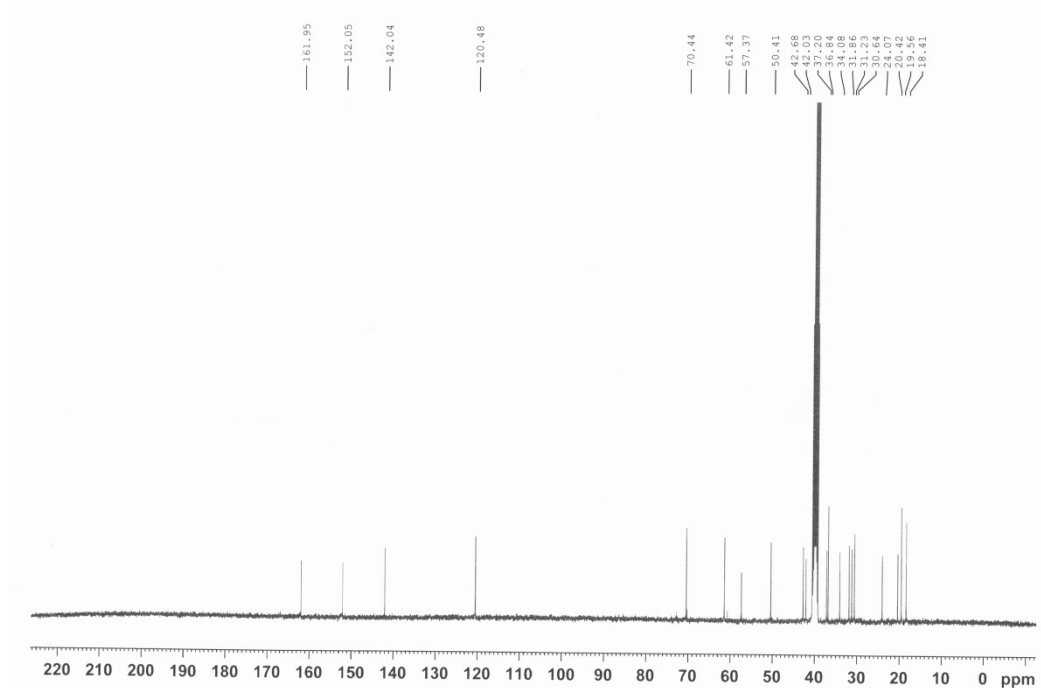

**Fig S23.**  $^{13}\text{C}$  NMR of compound **3f**



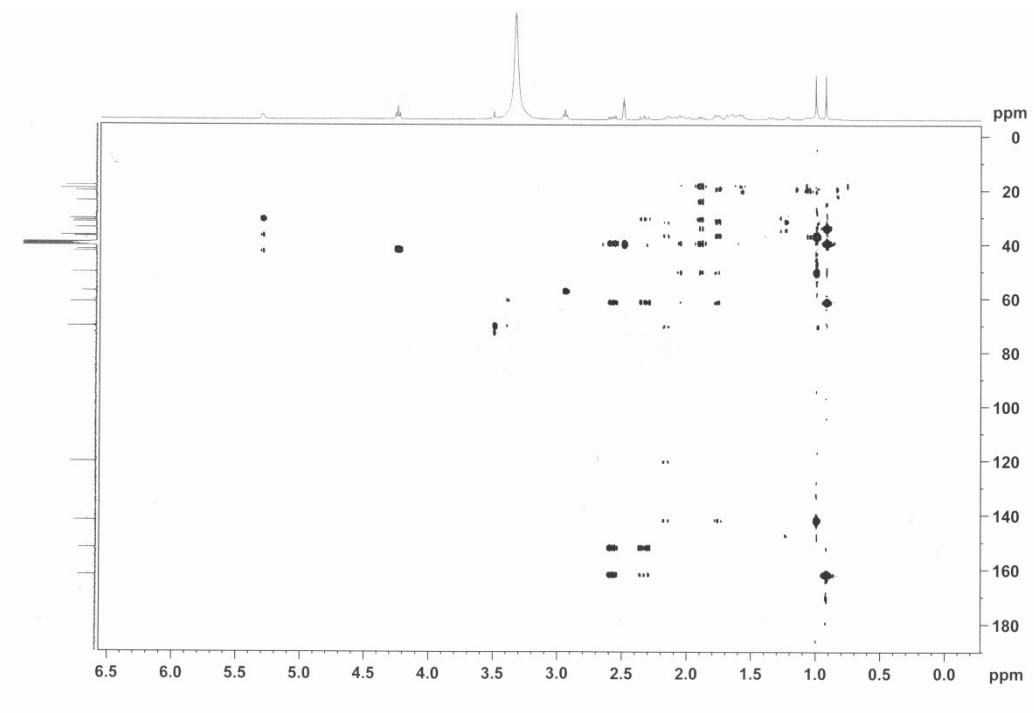

**Fig S24.**  $^1\text{H}$ - $^{13}\text{C}$  HMBC of compound **3f**

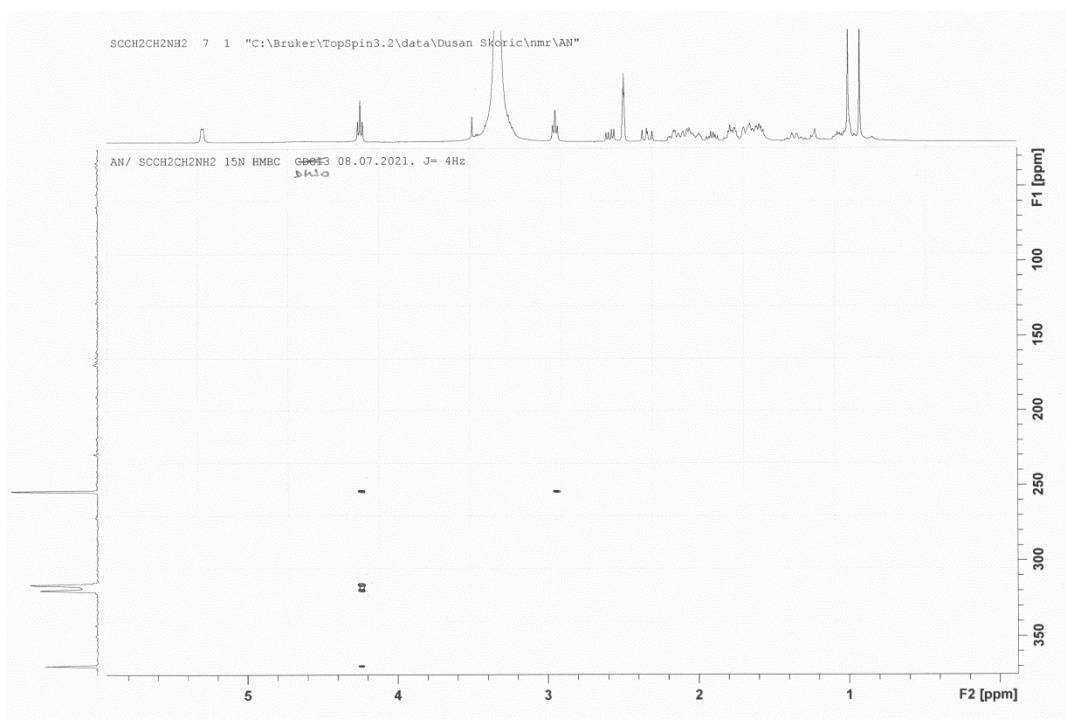

**Fig S25.**  $^1\text{H}$ - $^{15}\text{N}$  HMBC of compound **3f**

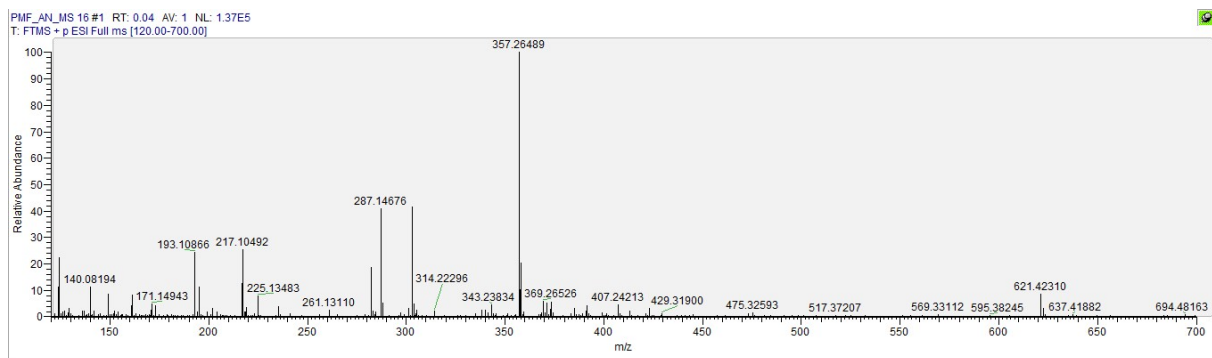

**Fig S26.** HRMS of compound **3f**

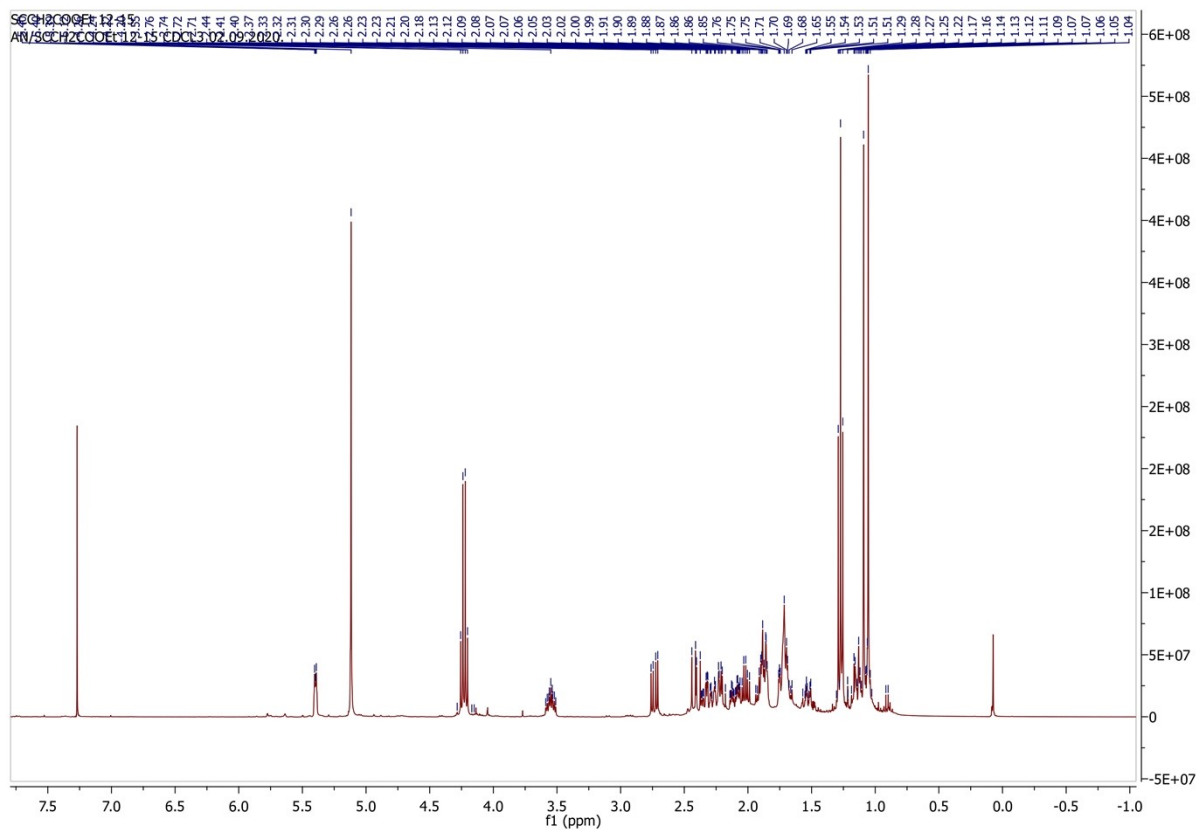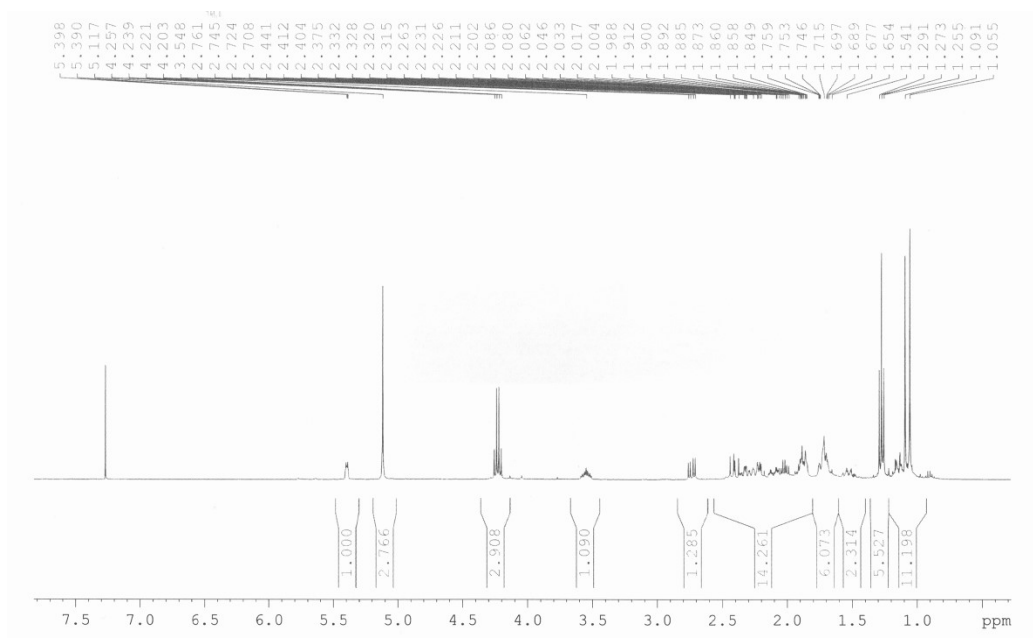

**Fig S27.  $^1\text{H}$  NMR of compound 3g**

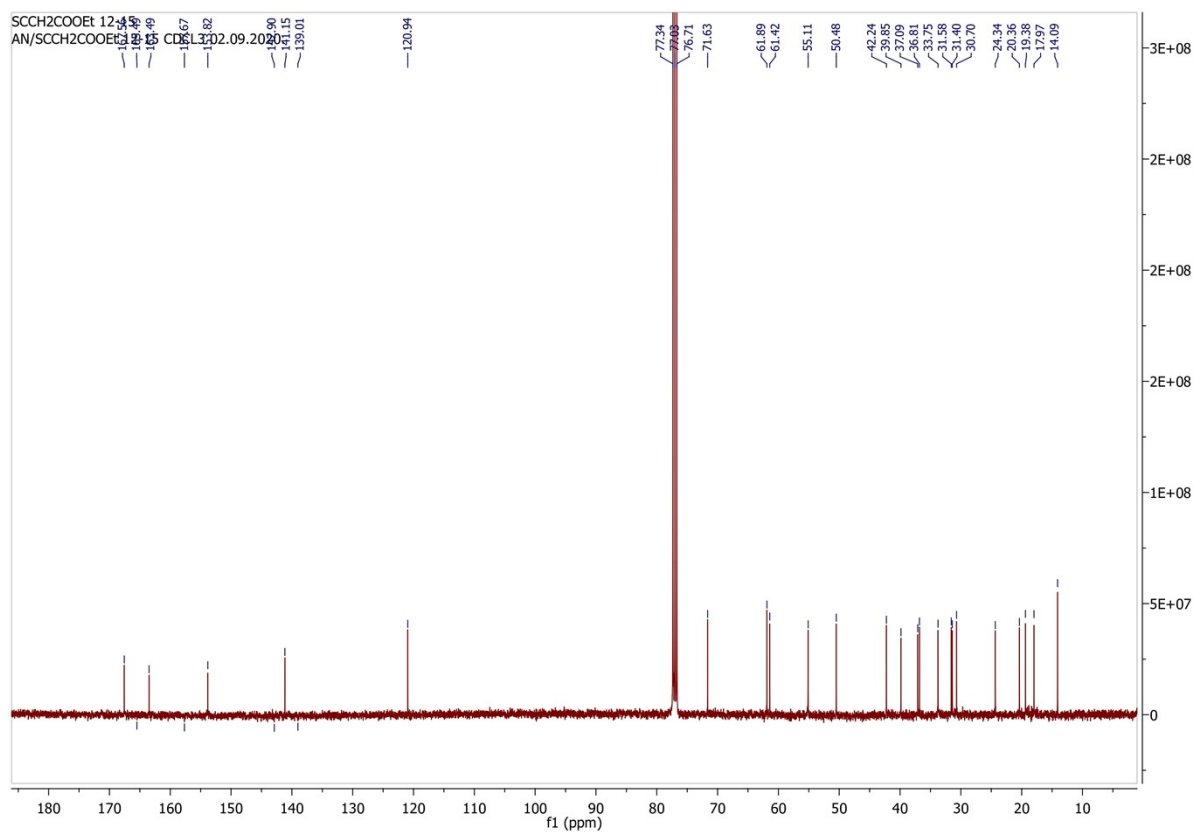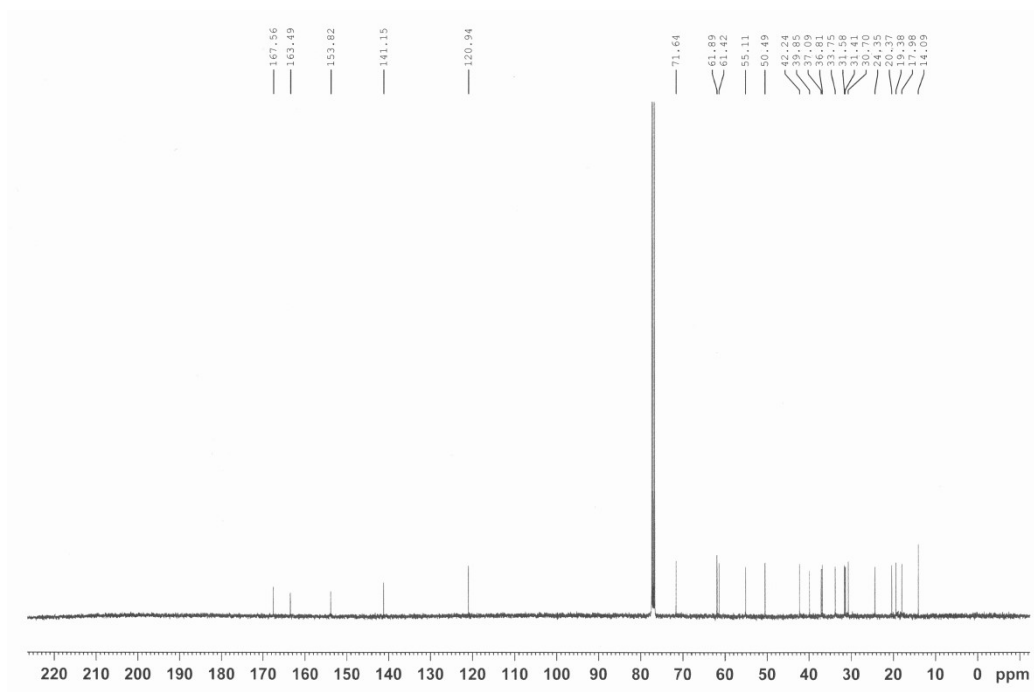

Fig S28.  $^{13}\text{C}$  NMR of compound **3g**

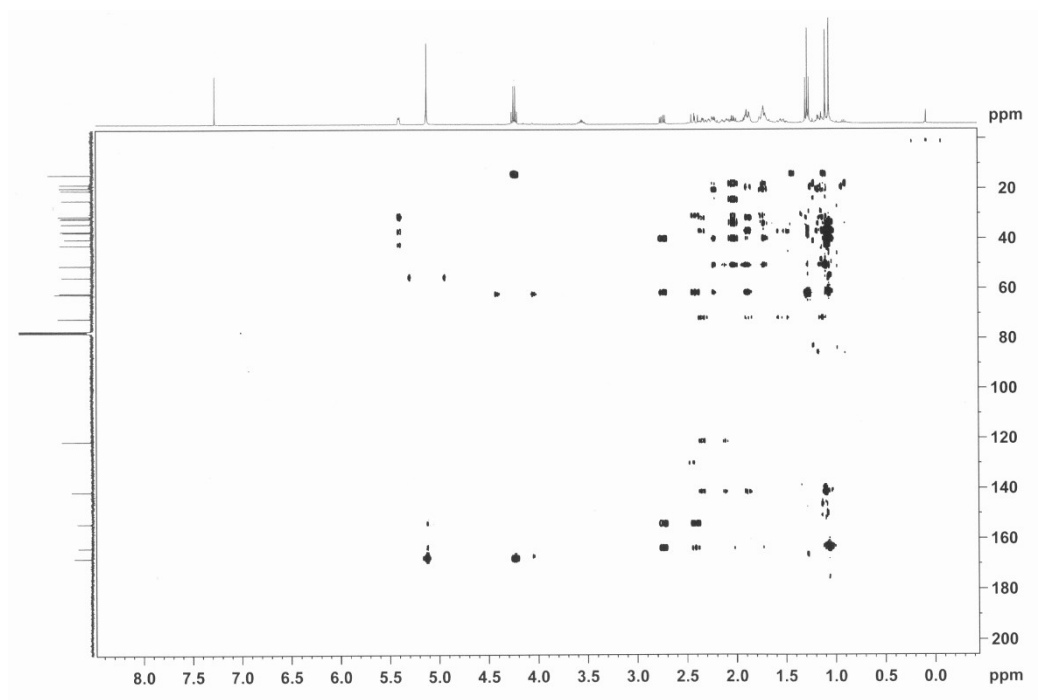

**Fig S29.**  $^1\text{H}$ - $^{13}\text{C}$  HMBC of compound **3g**

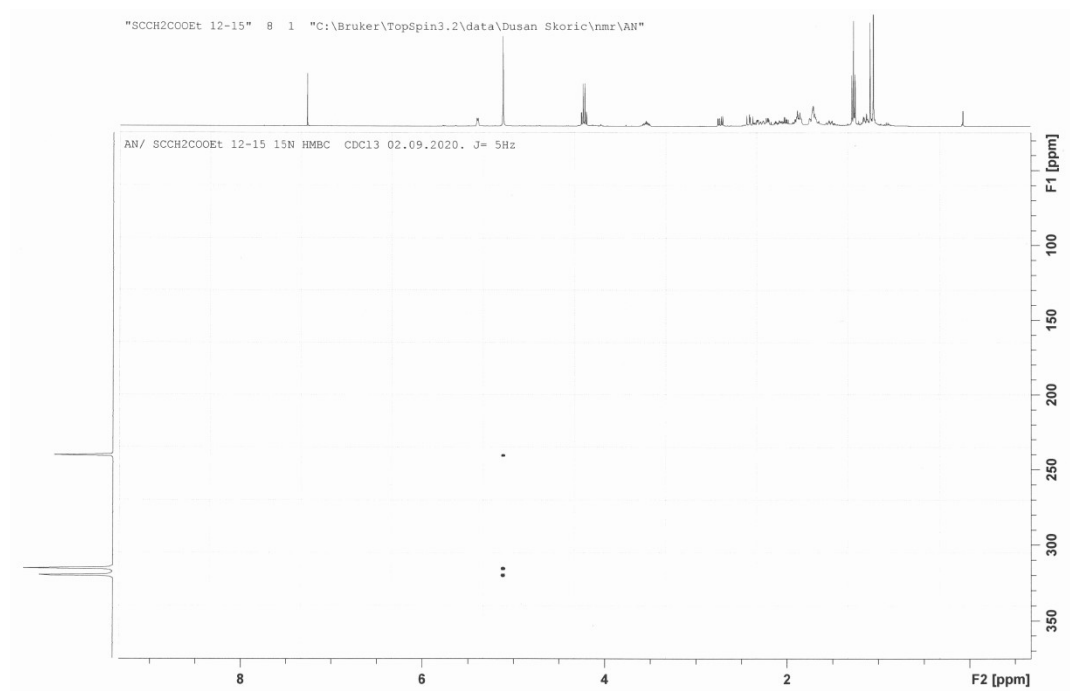

**Fig S30.**  $^1\text{H}$ - $^{15}\text{N}$  HMBC of compound **3g**

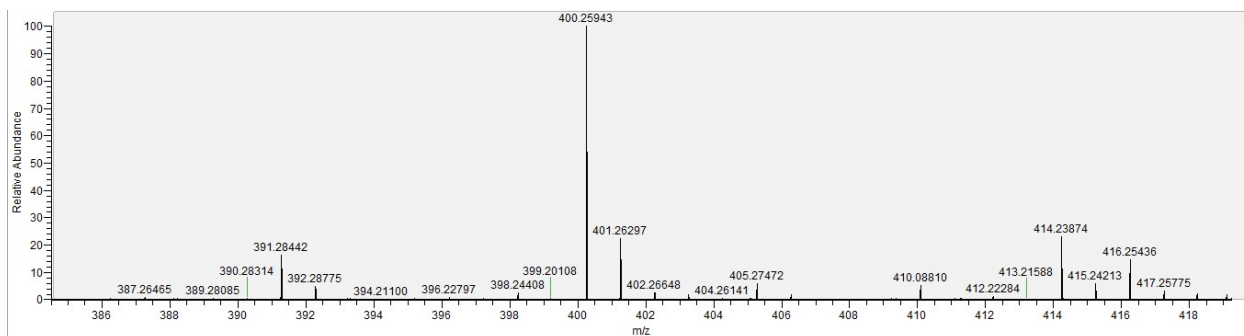

**Fig S31.** HRMS of compound **3g**

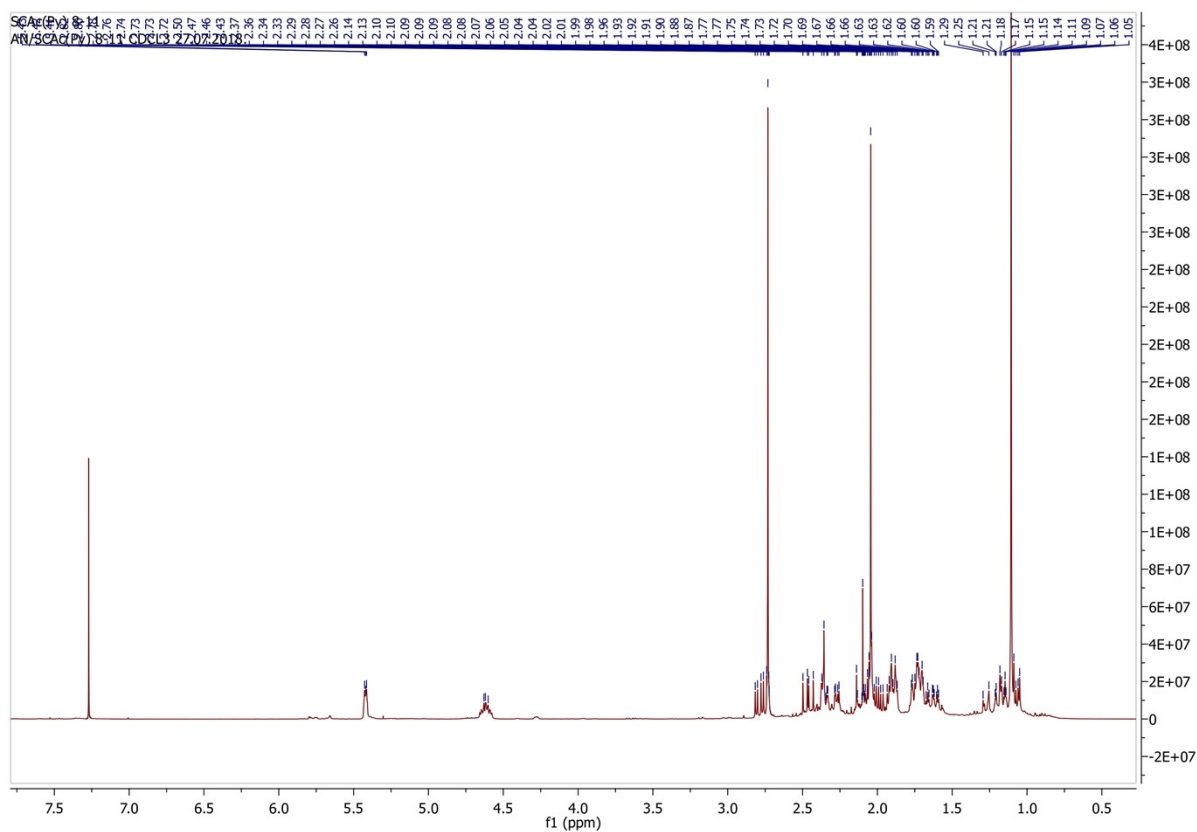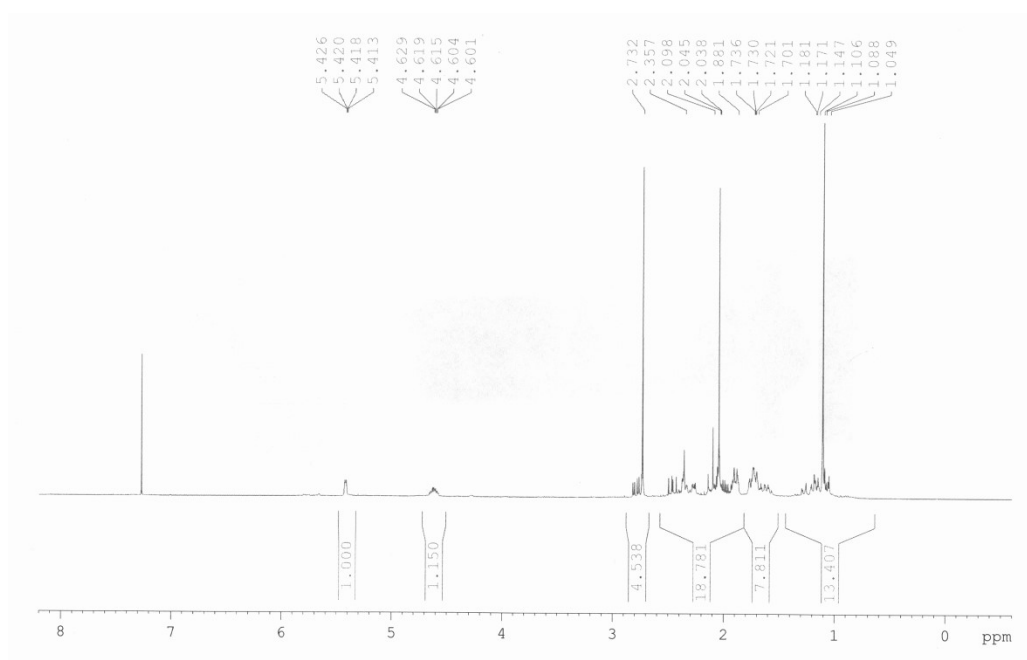

Fig S32. <sup>1</sup>H NMR of compound 3h

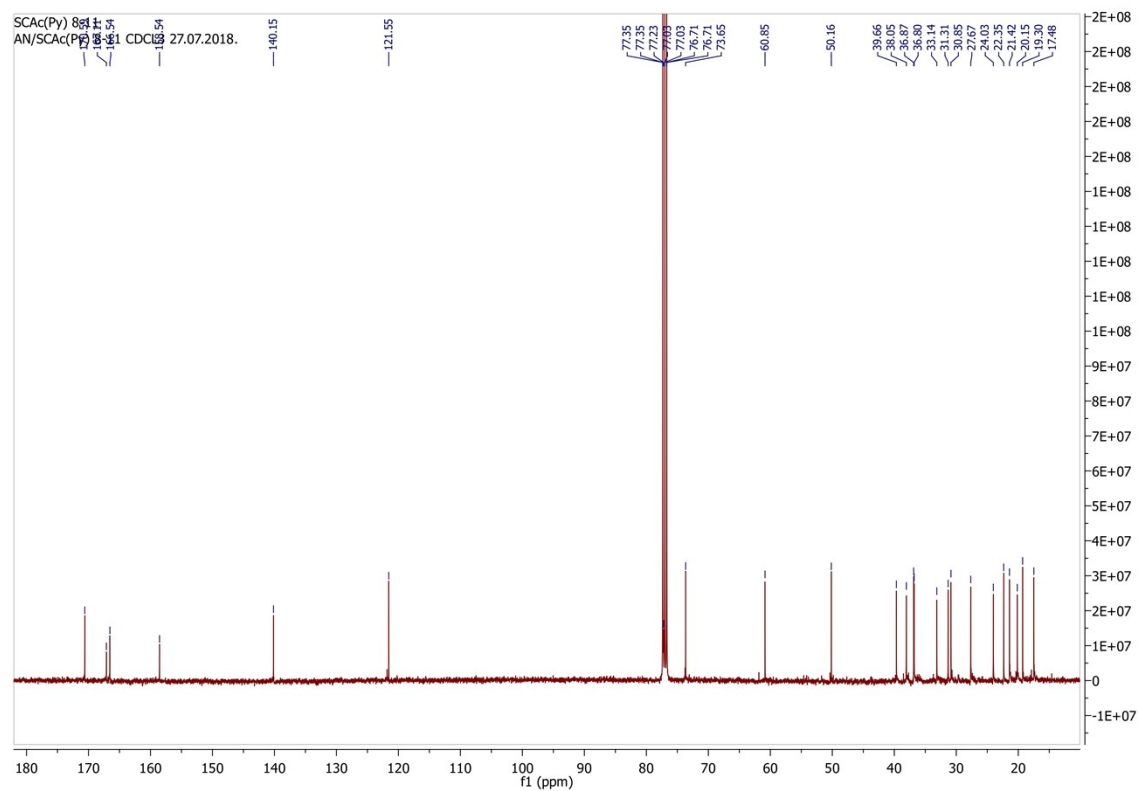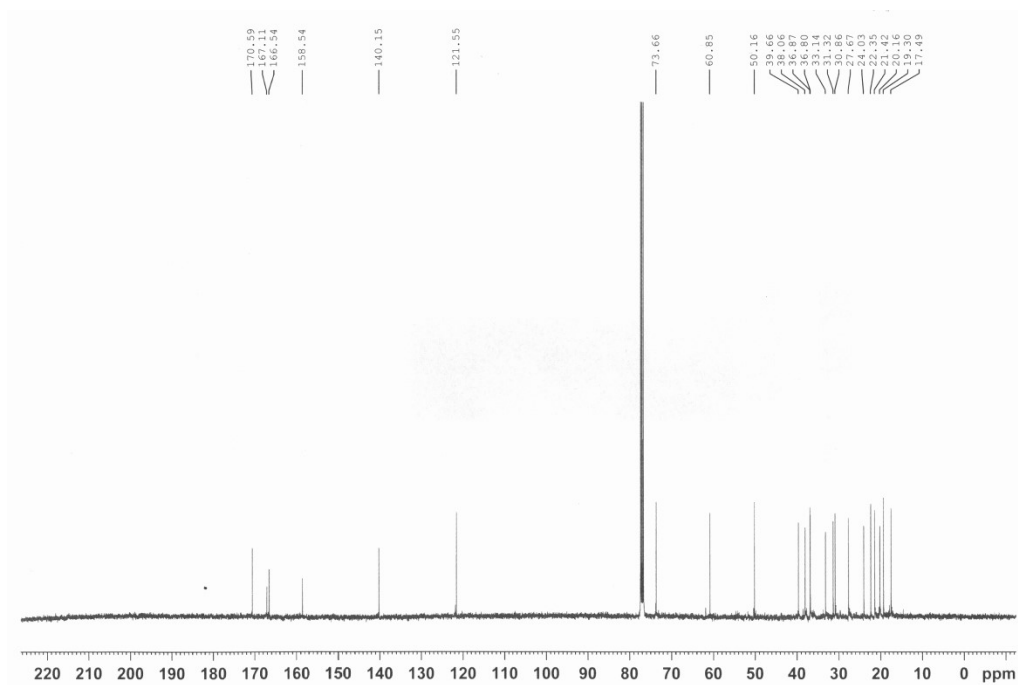

**Fig S33.** <sup>13</sup>C NMR of compound **3h**



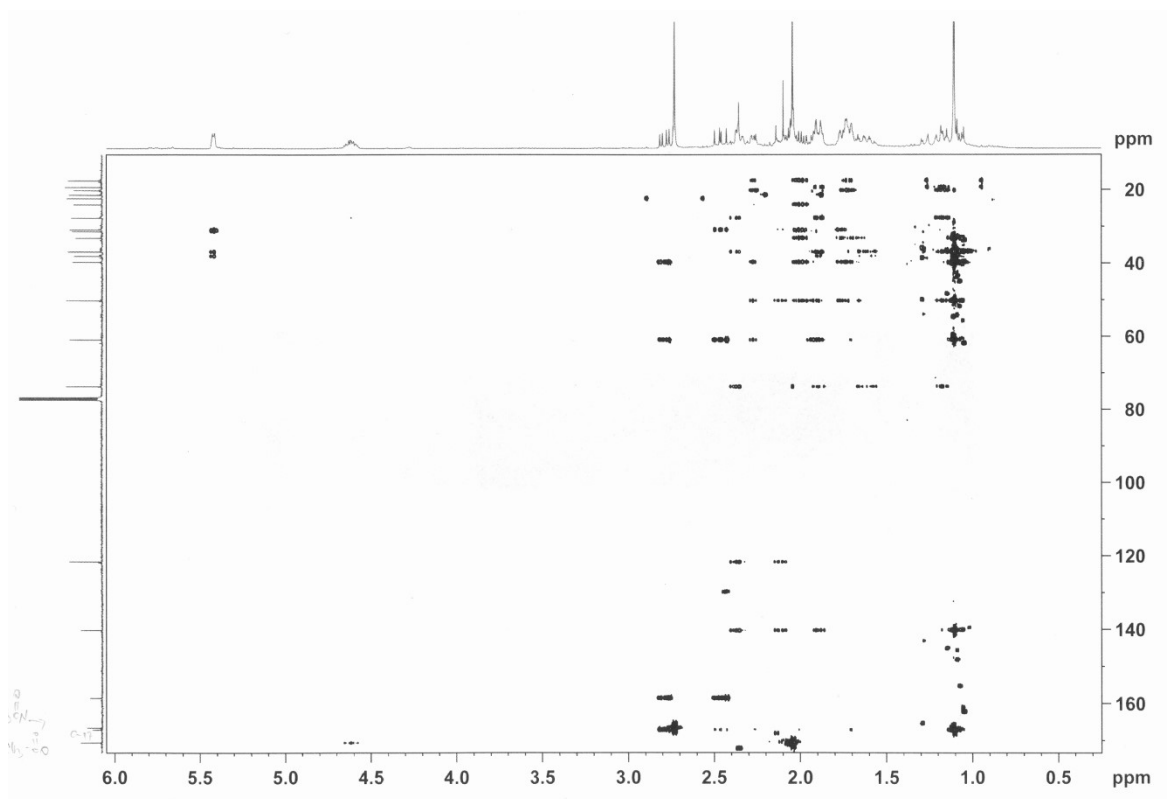

**Fig S34.**  $^1\text{H}$ - $^{13}\text{C}$  HMBC of compound **3h**

OE0328 #1-284 RT: 0.00-0.50 AV: 284 NL: 5.60E4  
T: FTMS + p ESI Full ms [200.0000-500.0000]

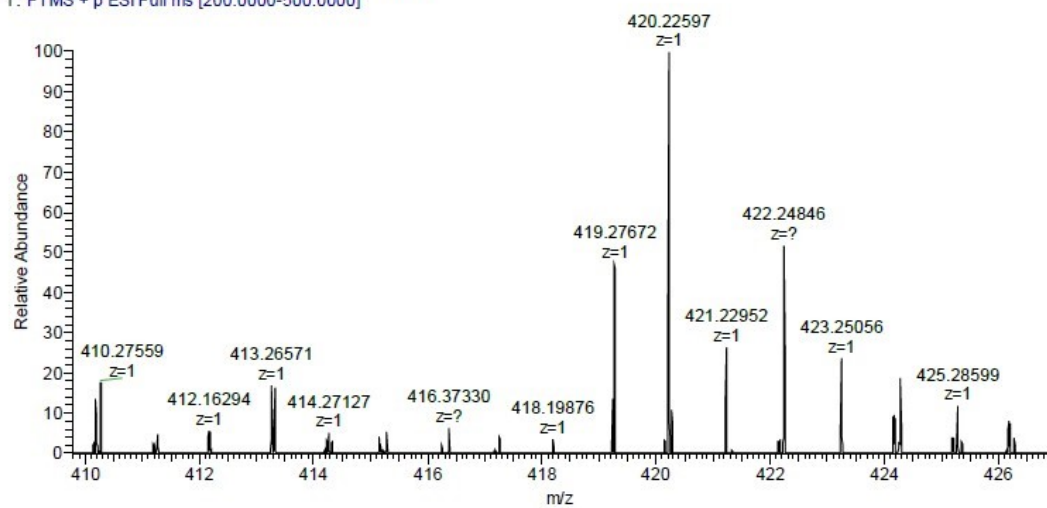

**Fig S35.** HRMS of compound **3h**

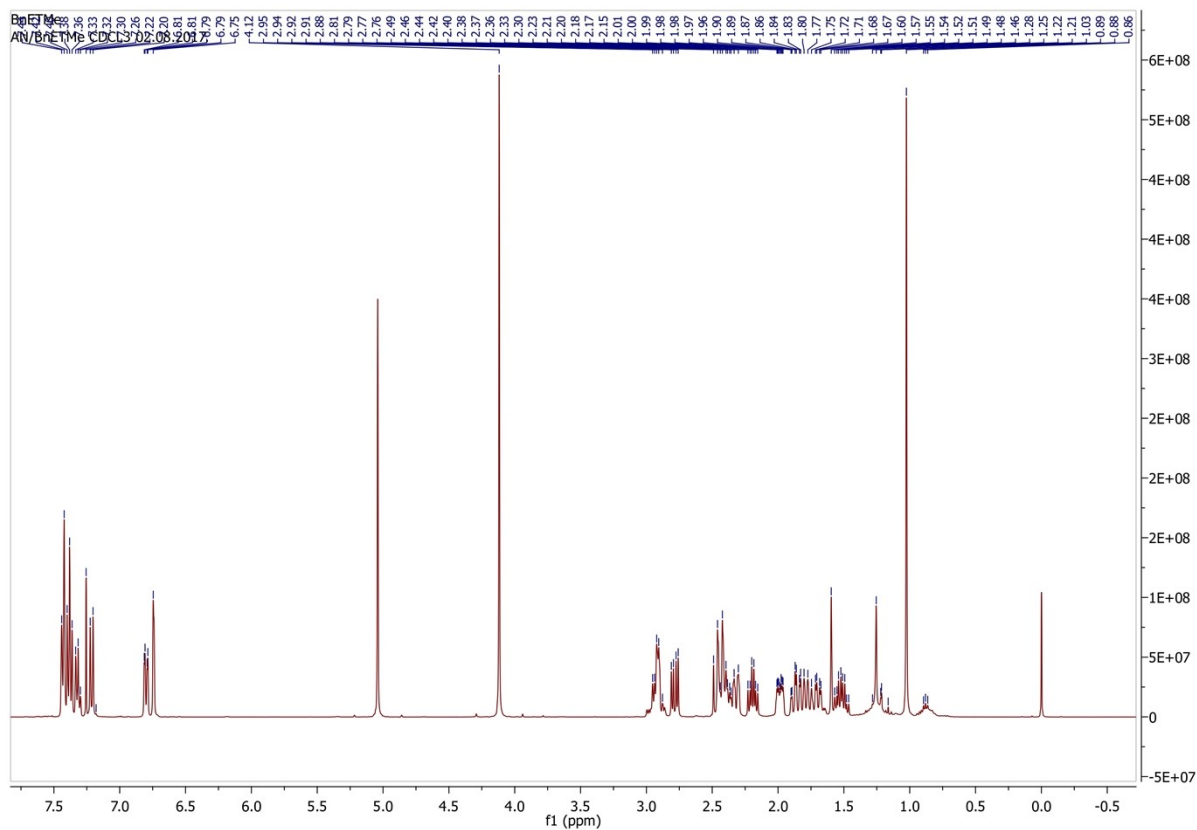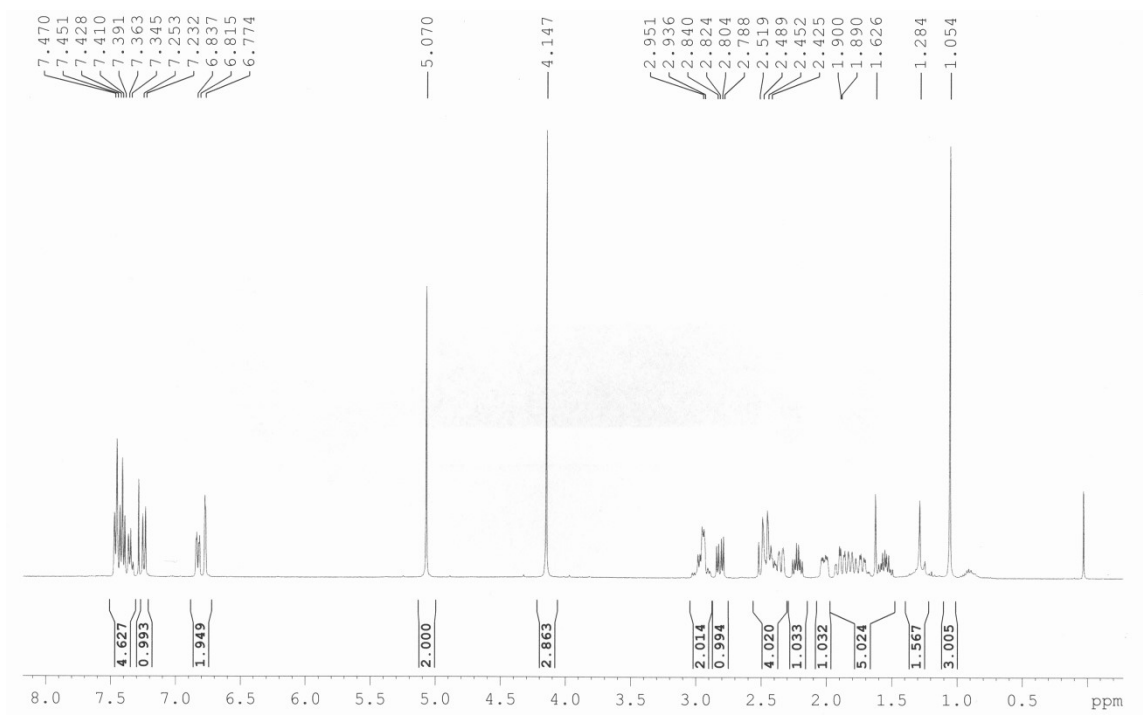

Fig S36. <sup>1</sup>H NMR of compound 4a

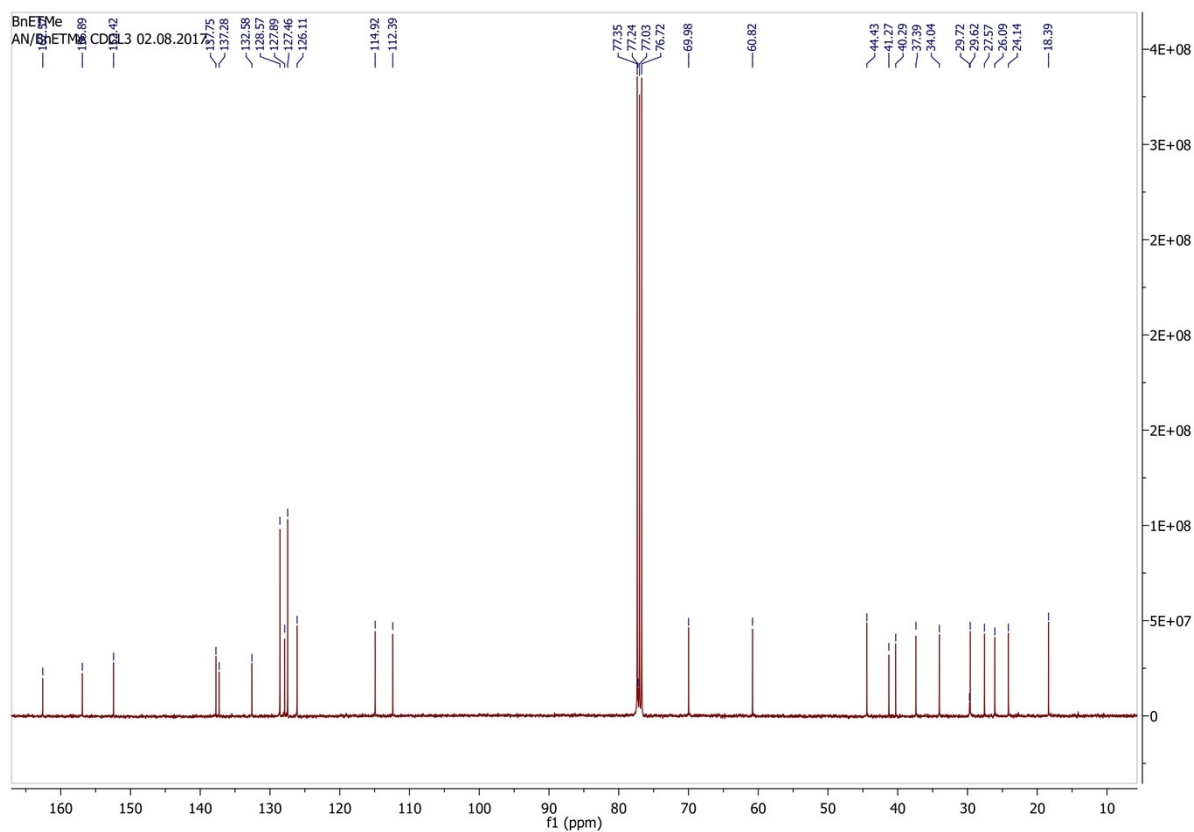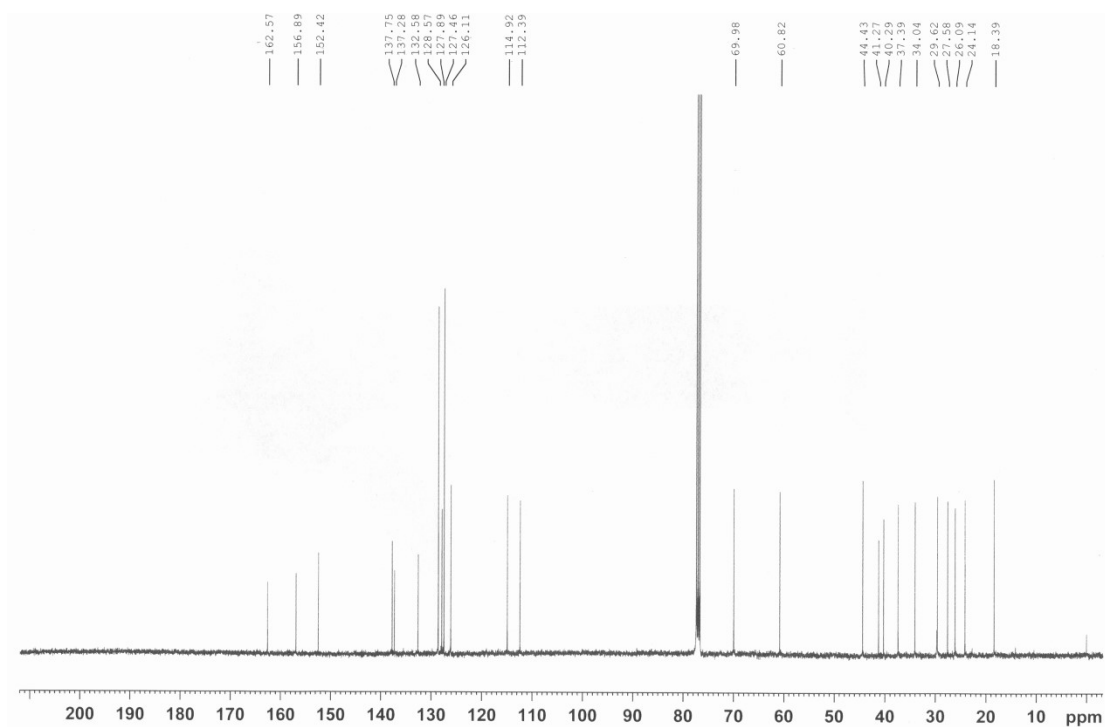

**Fig S37.** <sup>13</sup>C NMR of compound **4a**

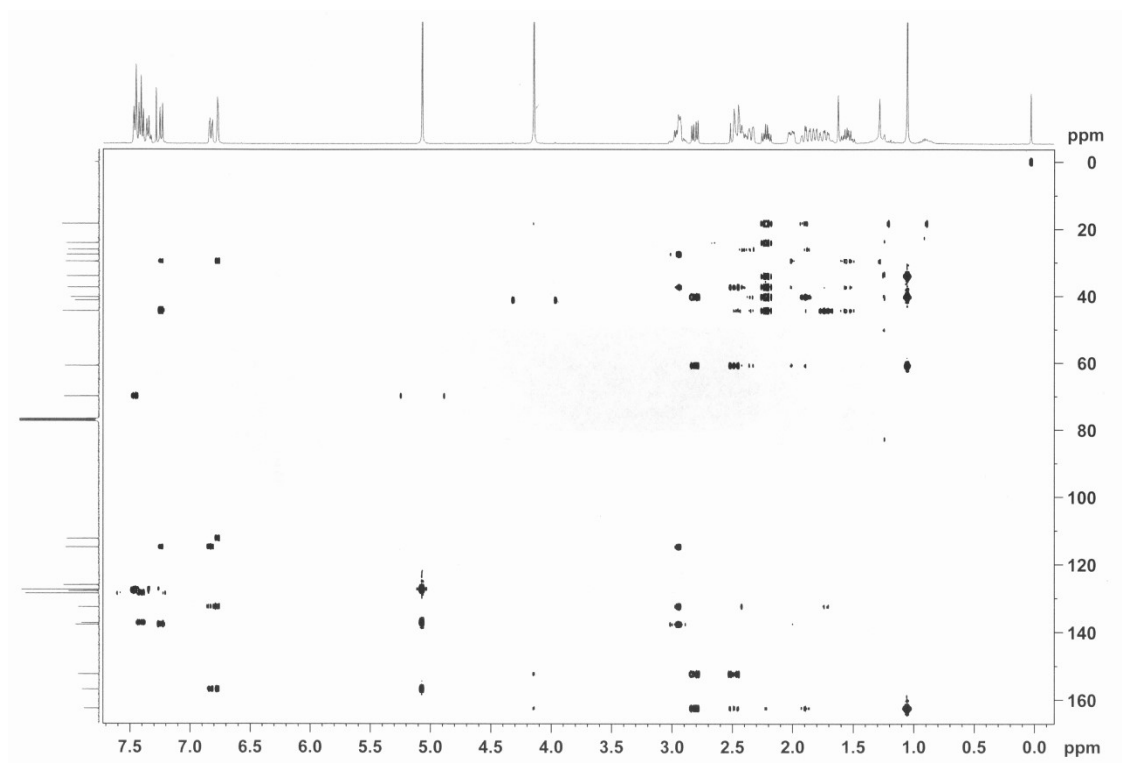

**Fig S38.**  $^1\text{H}$ - $^{13}\text{C}$  HMBC of compound **4a**

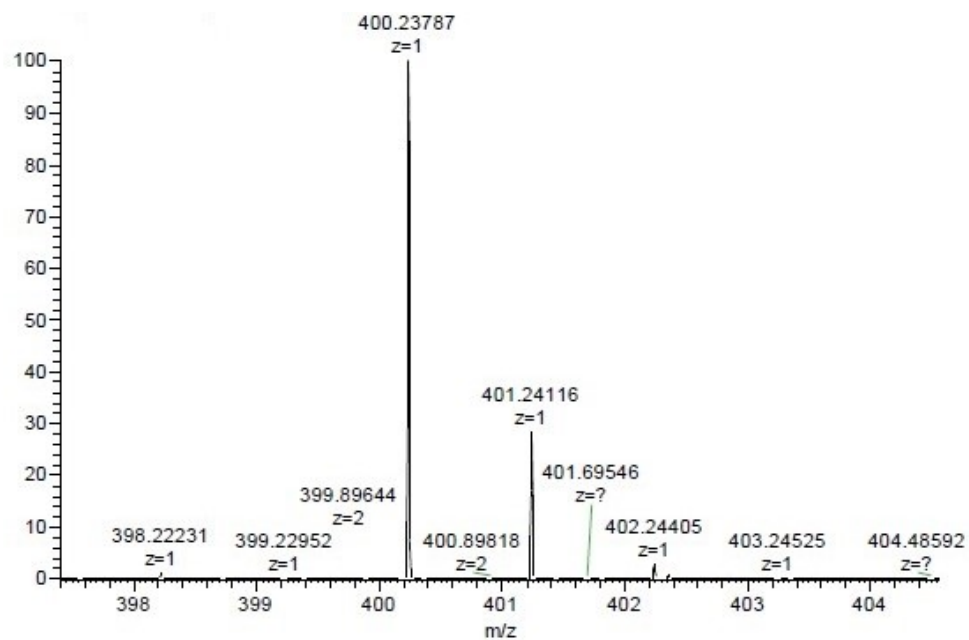

**Fig S39.** HRMS of compound **4a**

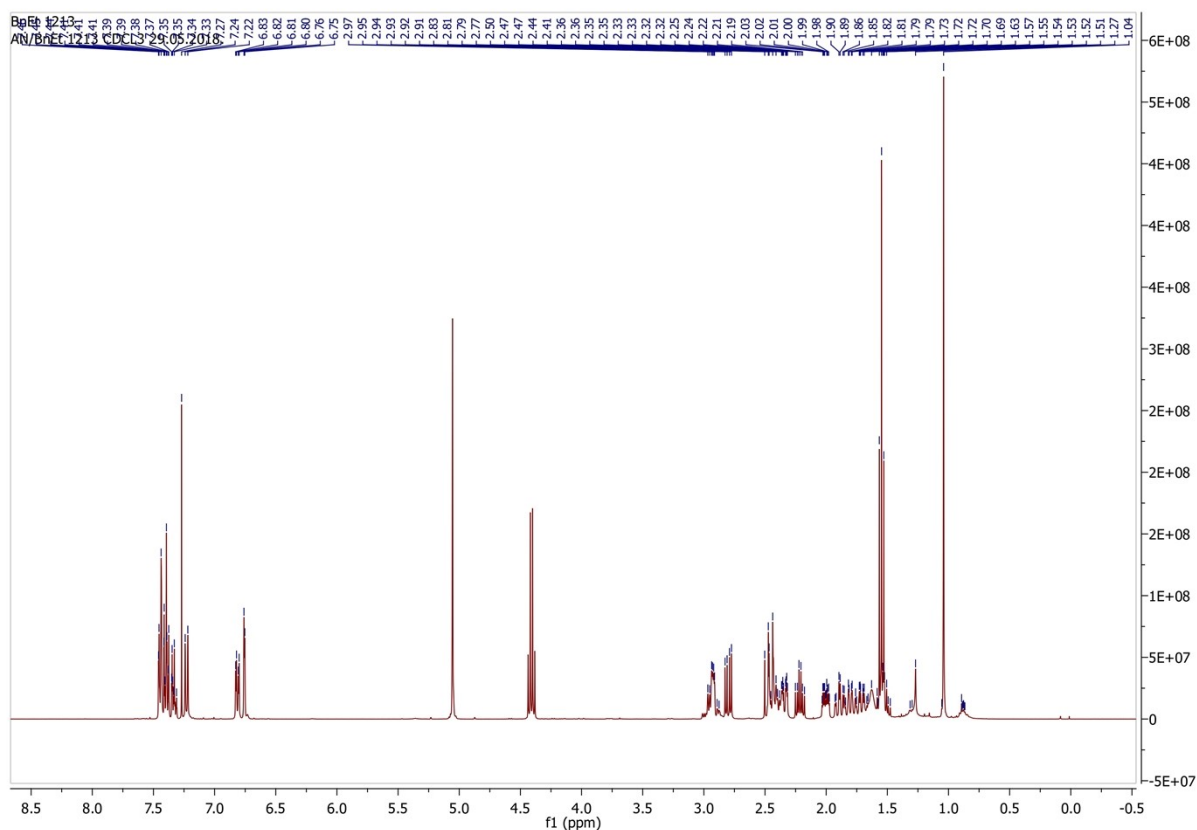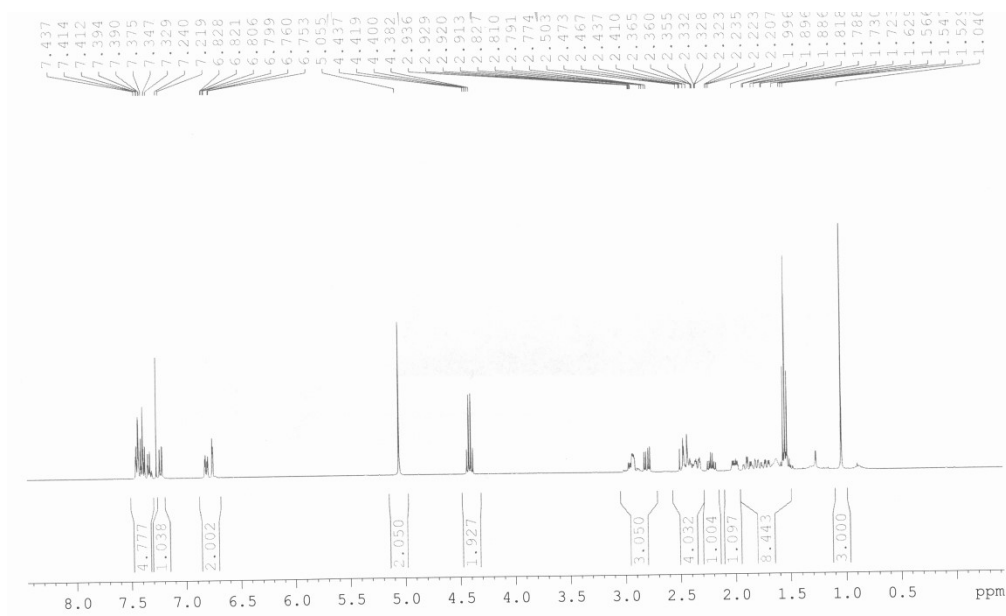

Fig S40. <sup>1</sup>H NMR of compound 4b

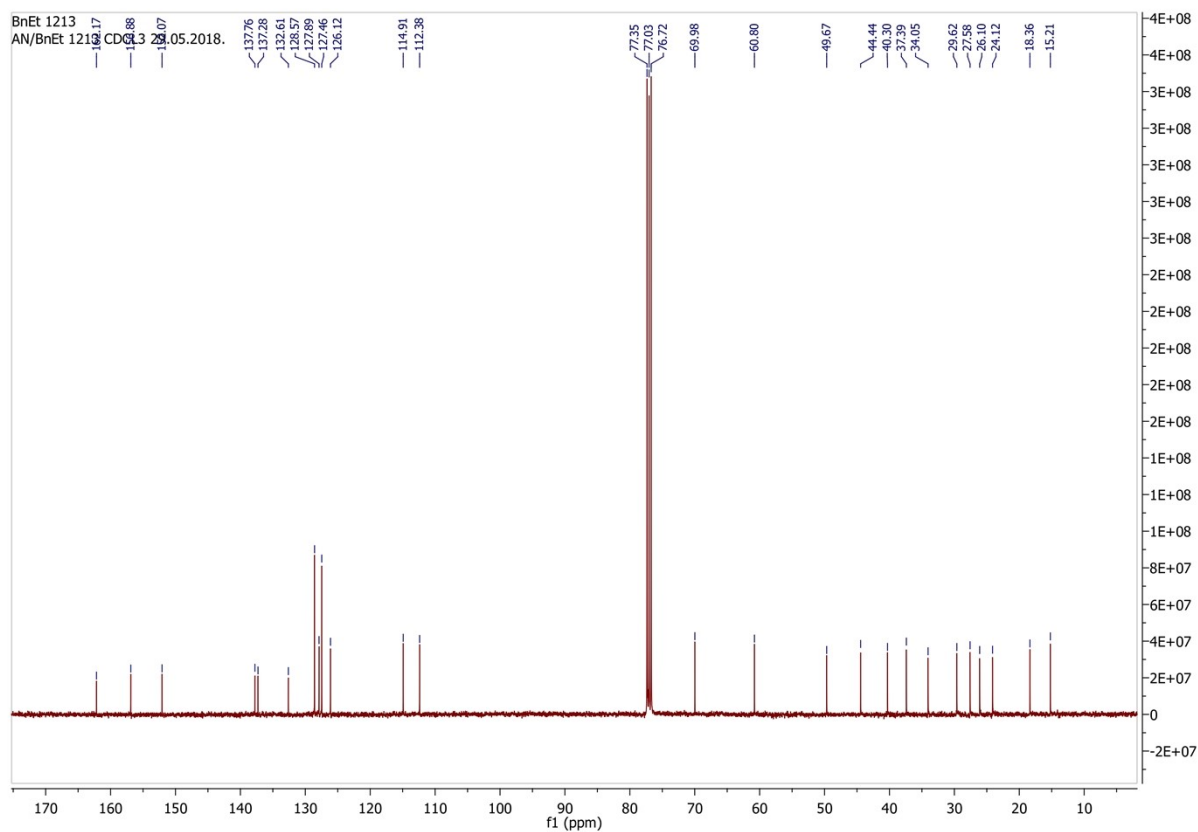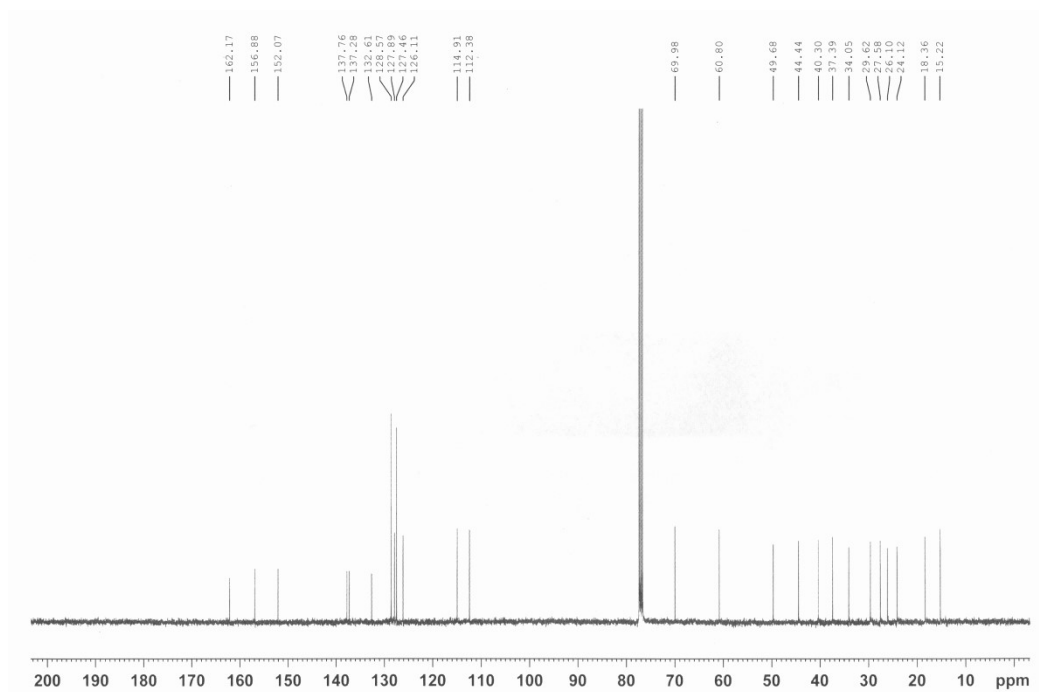

**Fig S41.**  $^{13}\text{C}$  NMR of compound **4b**

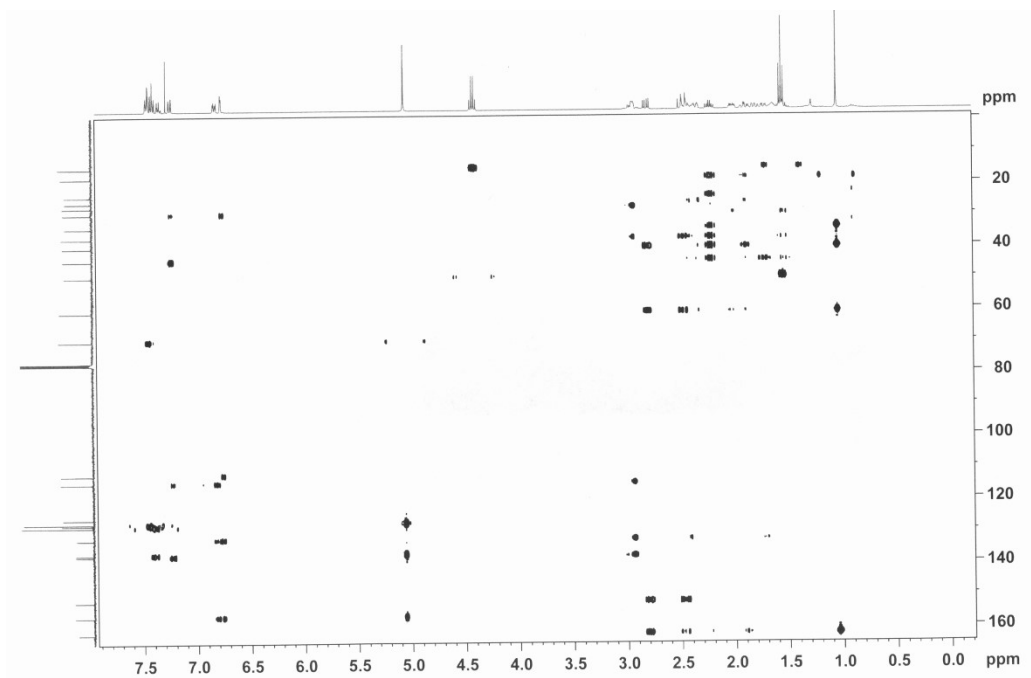

**Fig S42.**  $^1\text{H}$ - $^{13}\text{C}$  HMBC of compound **4b**

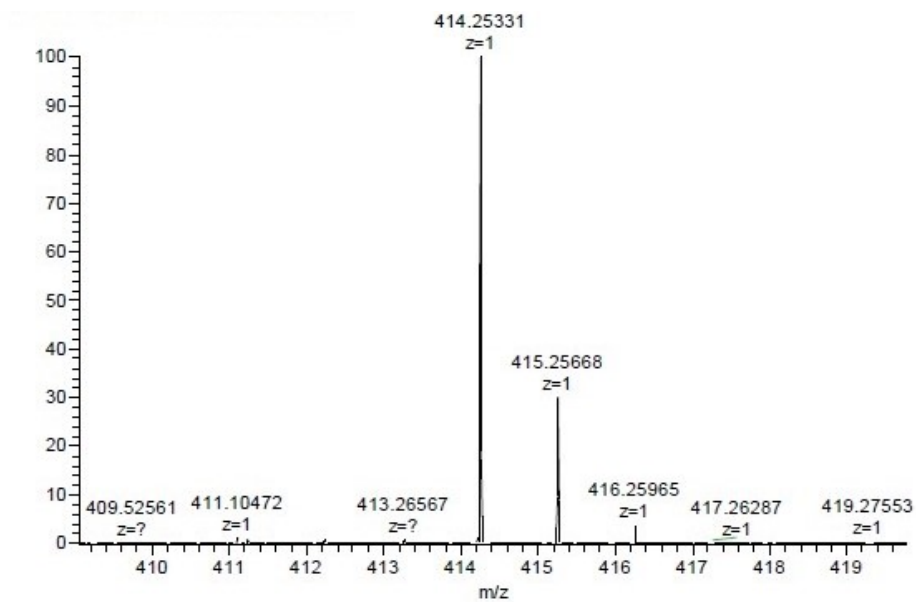

**Fig S43.** HRMS of compound **4b**

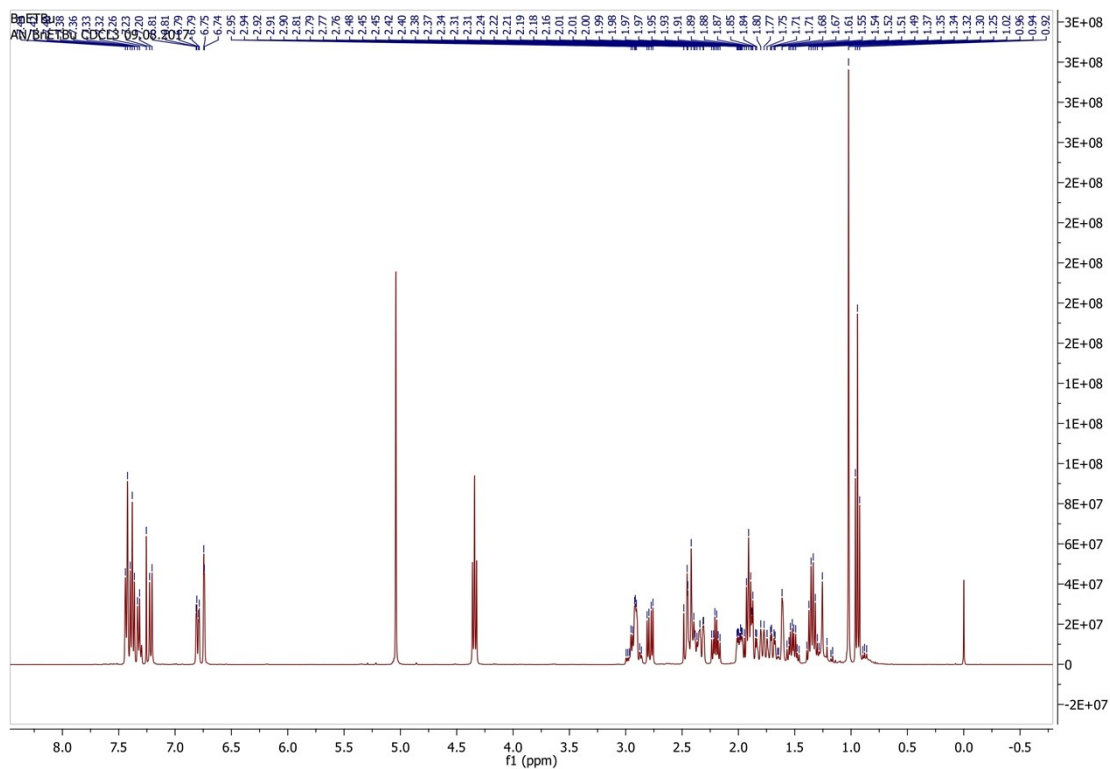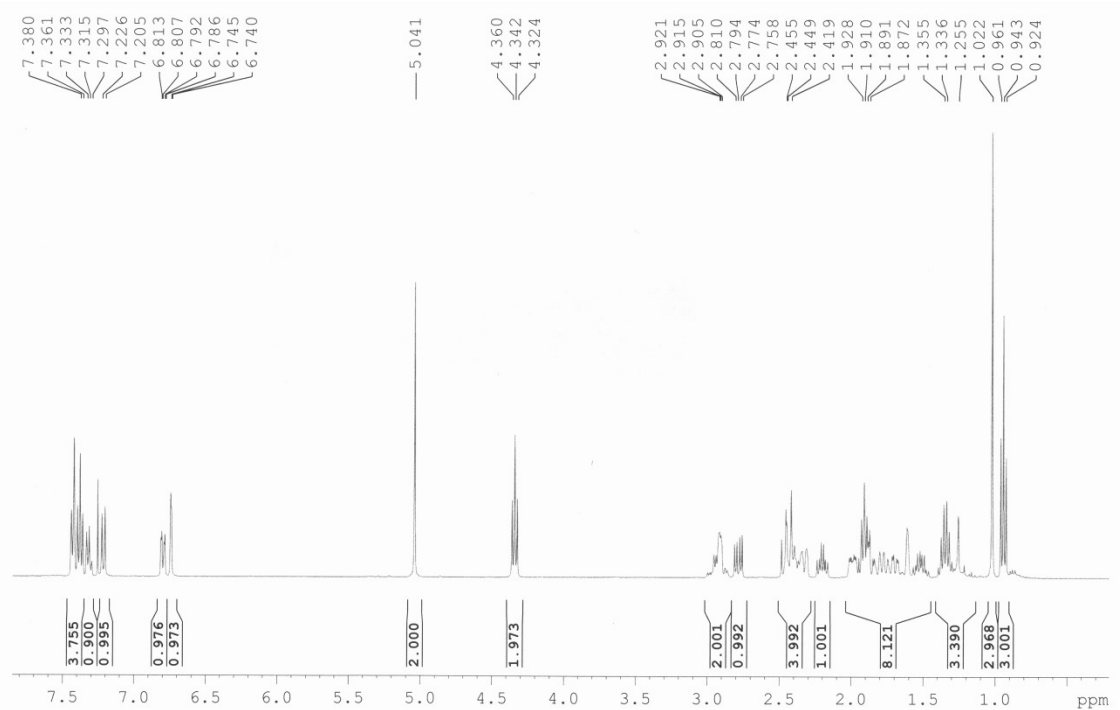

Fig S44. <sup>1</sup>H NMR of compound 4c



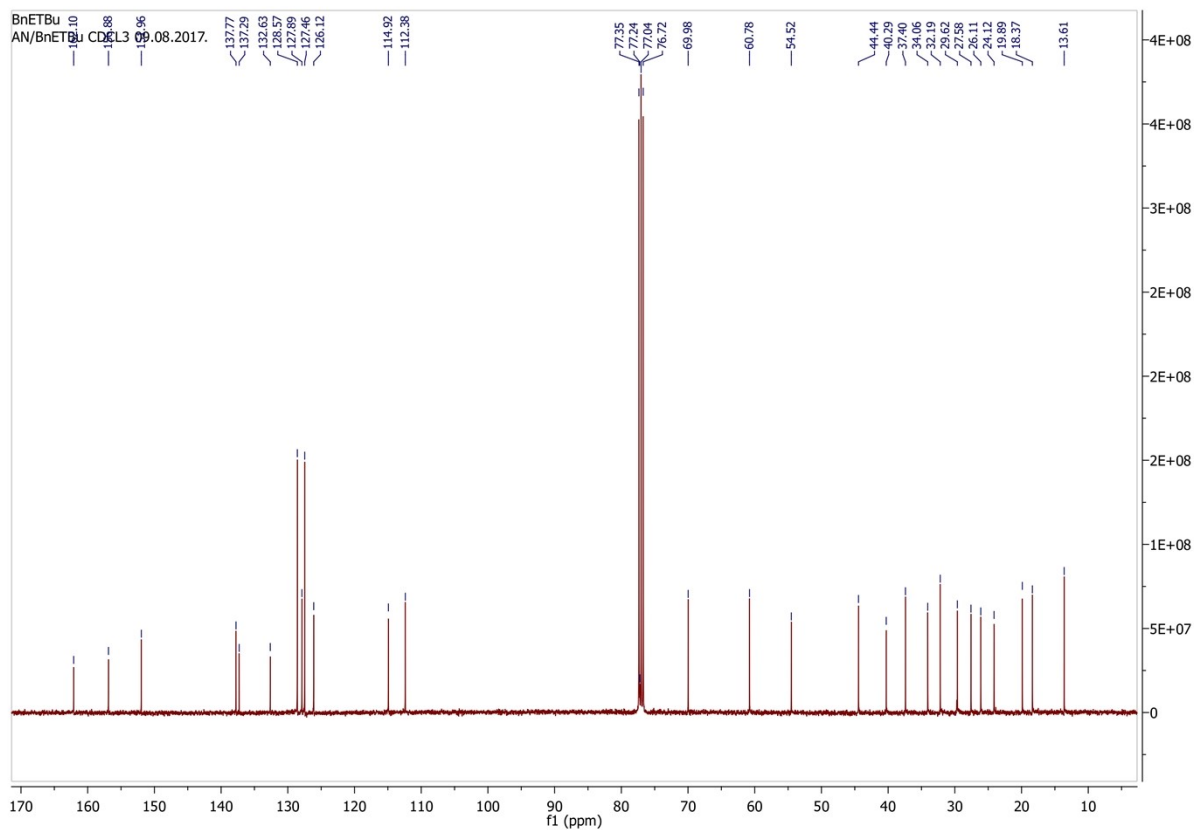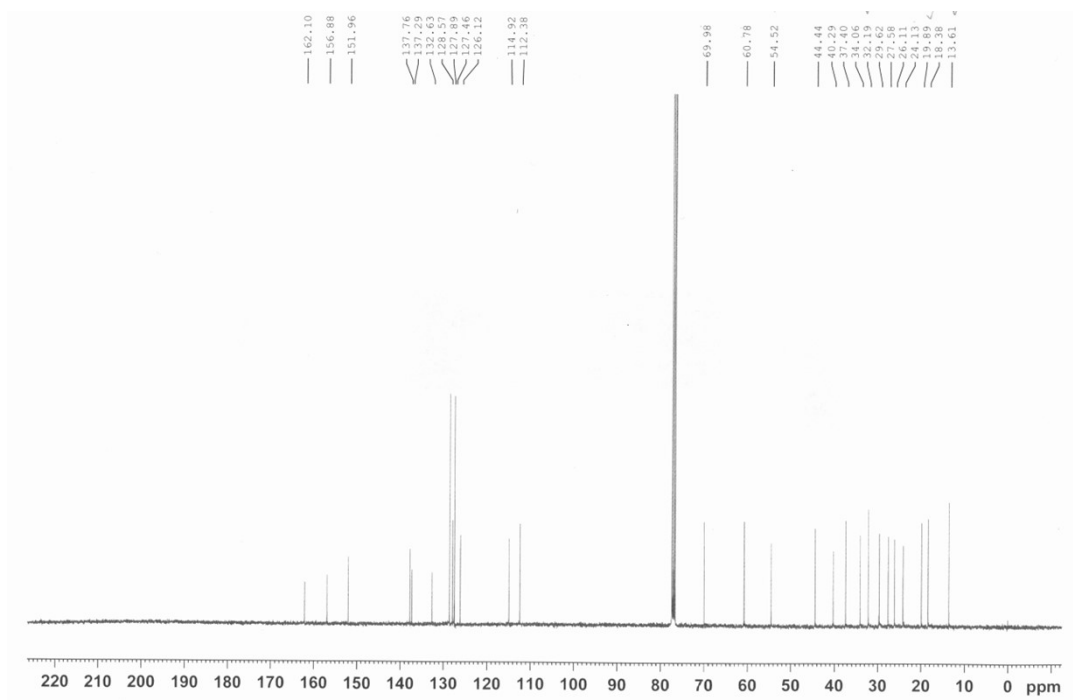

Fig S45. <sup>13</sup>C NMR of compound 4c

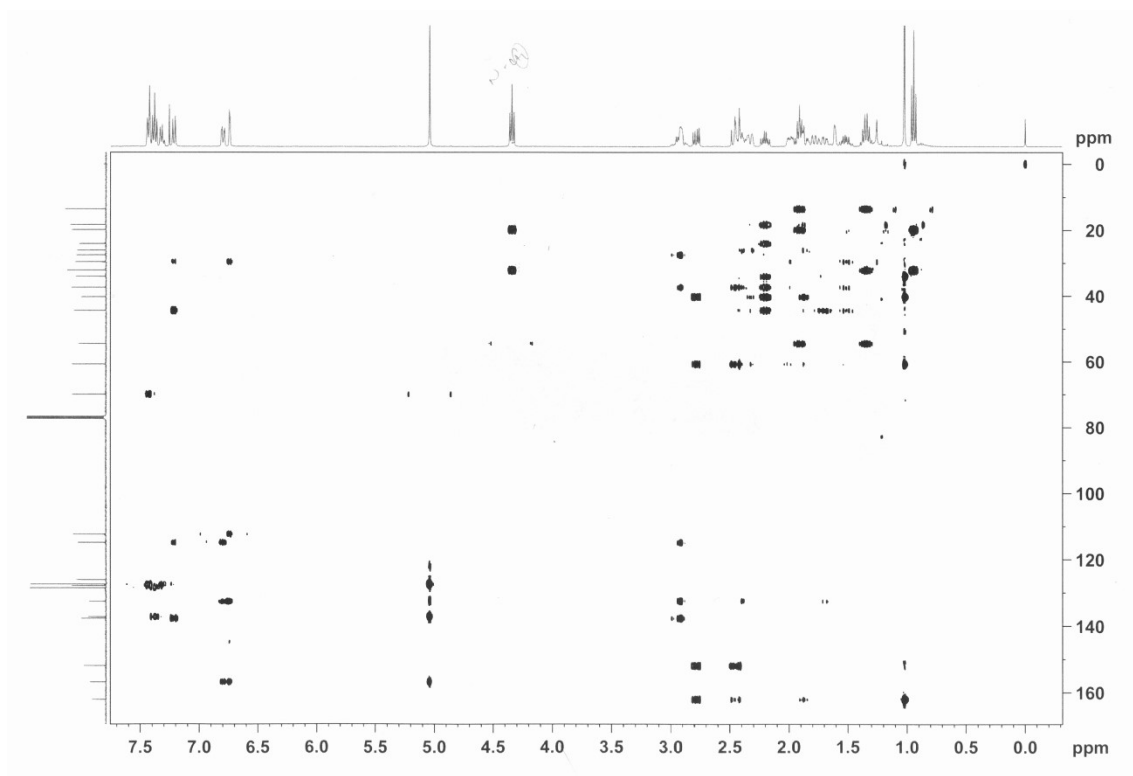

**Fig S46.**  $^1\text{H}$ - $^{13}\text{C}$  HMBC of compound **4c**

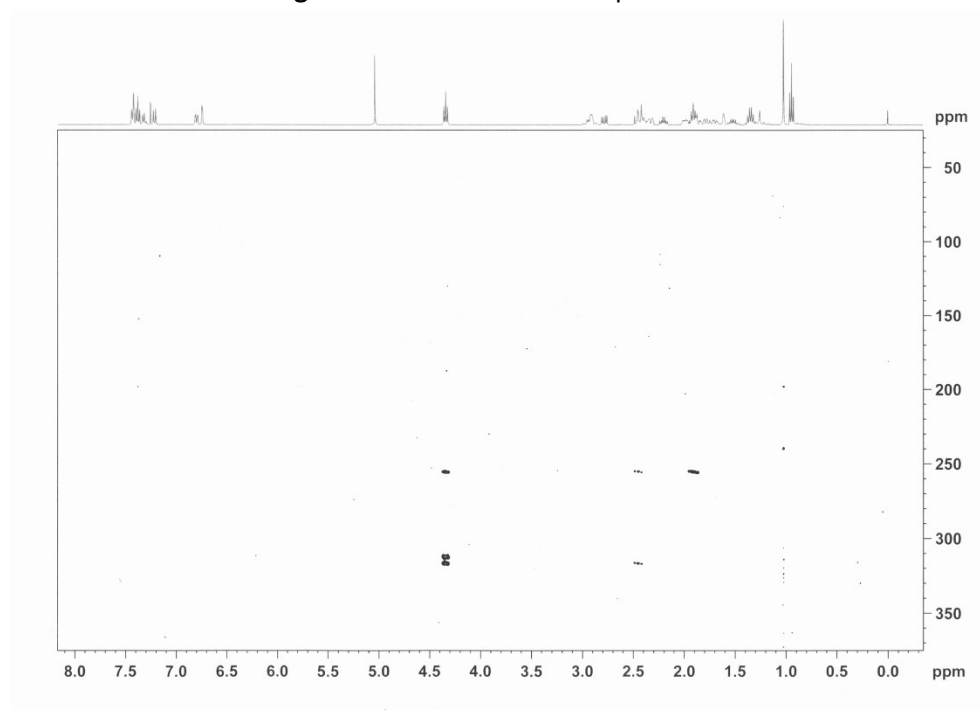

**Fig S47.**  $^1\text{H}$ - $^{15}\text{N}$  HMBC of compound **4c**

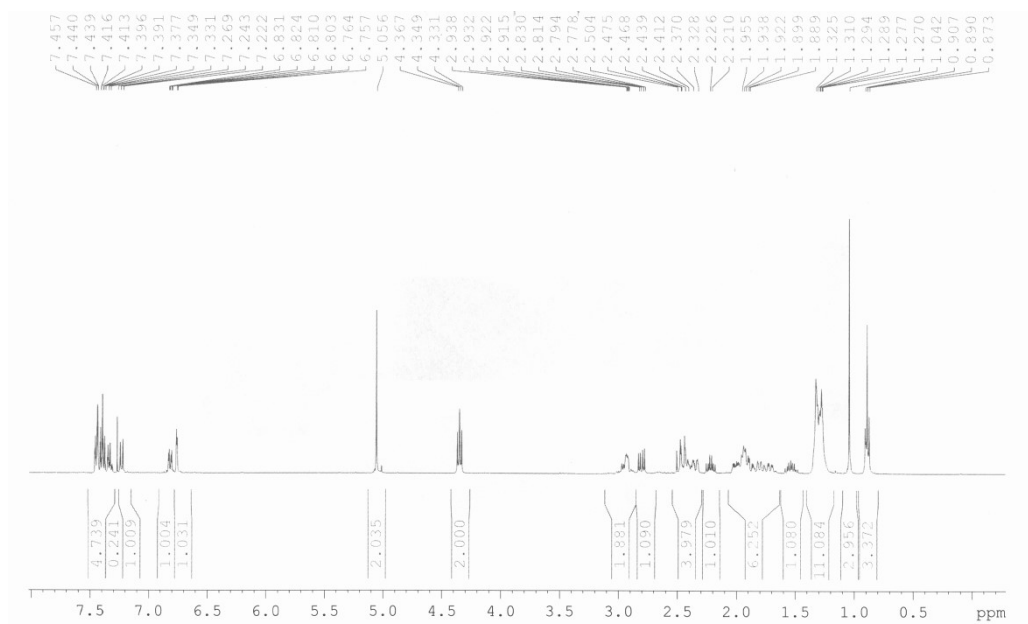

**Fig S48.**  $^1\text{H}$  NMR of compound **4d**

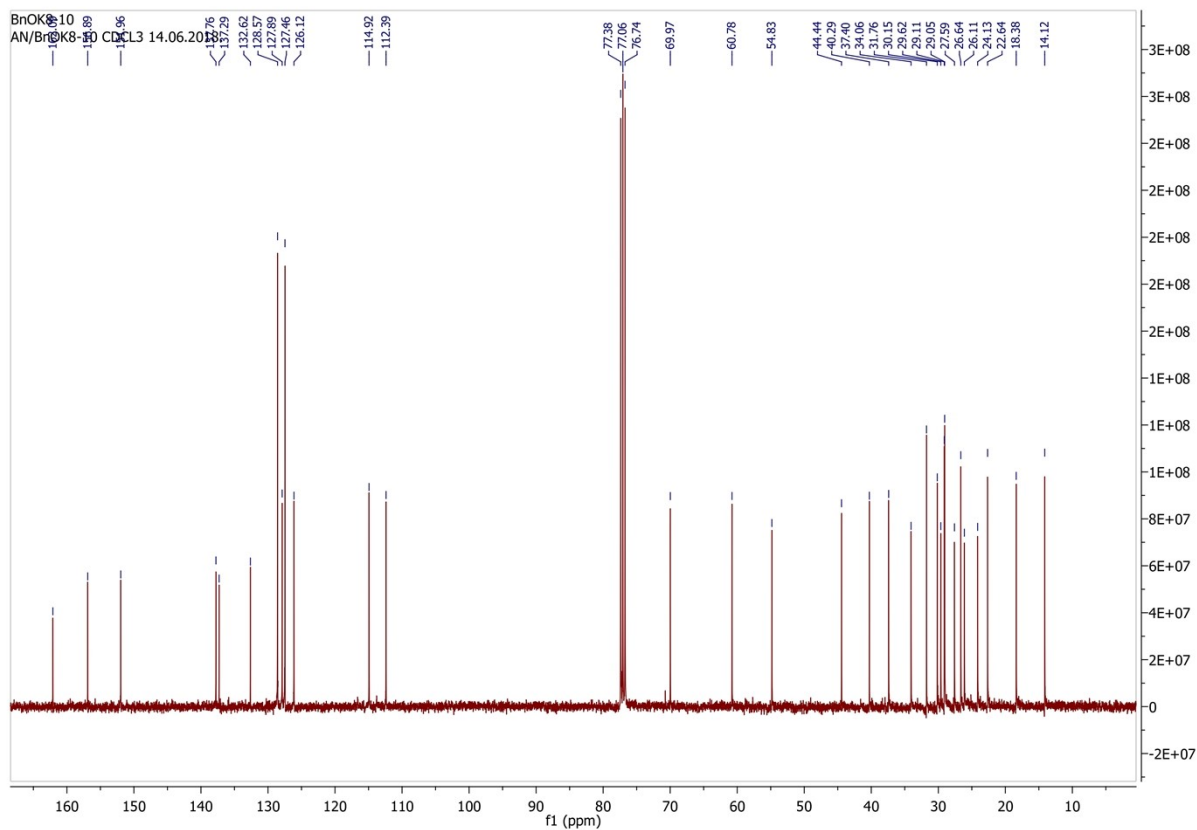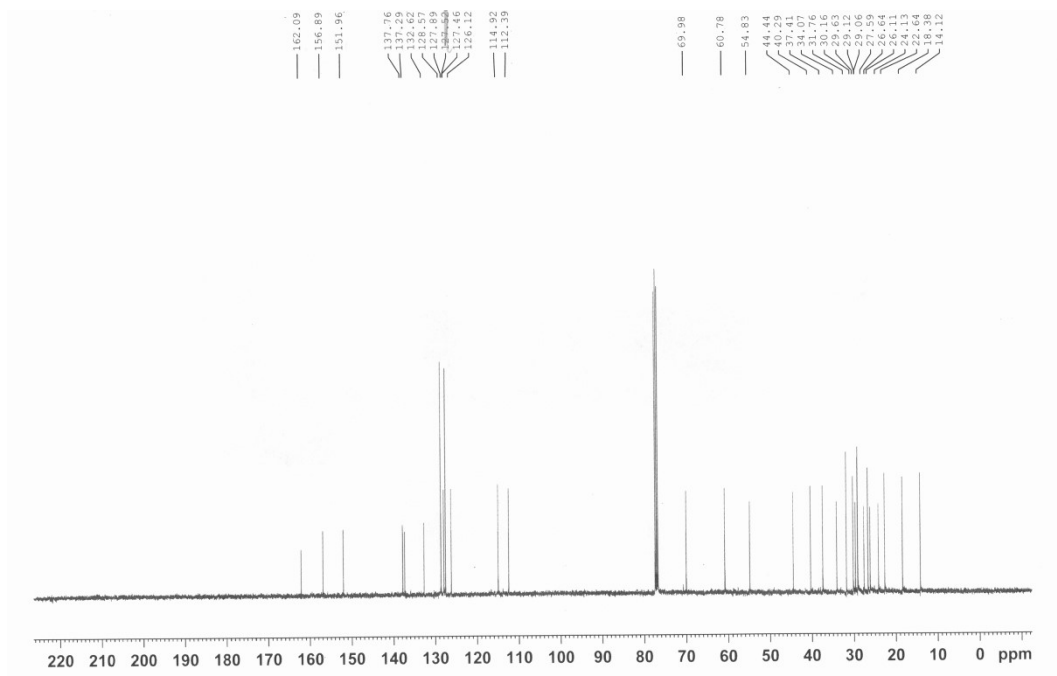

Fig S49. <sup>13</sup>C NMR of compound 4d

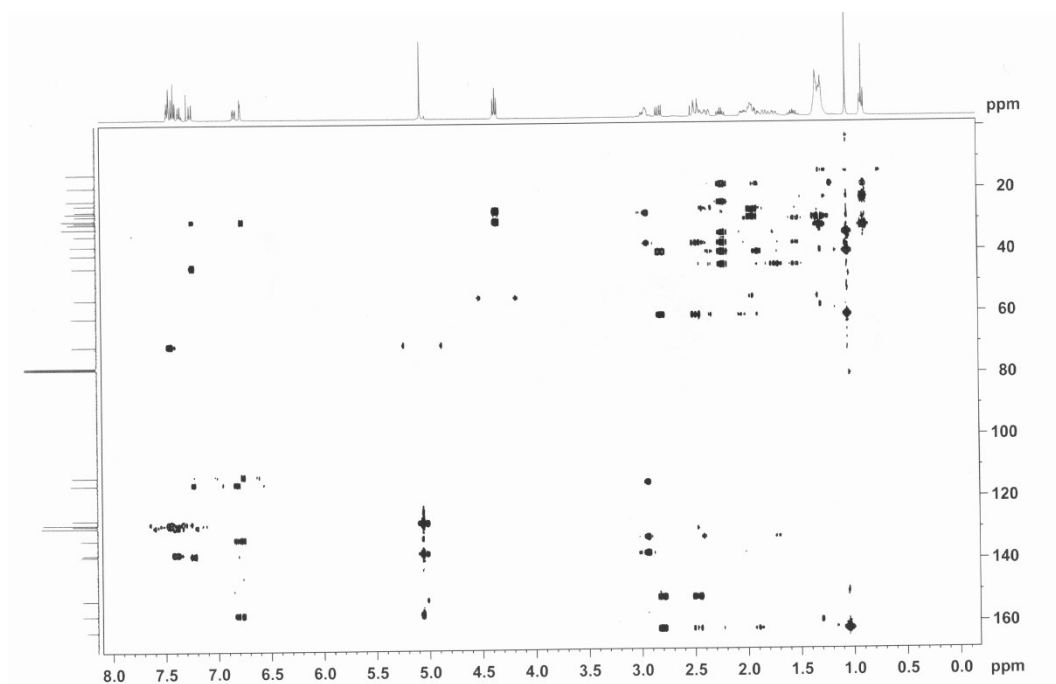

**Fig S50.**  $^1\text{H}$ - $^{13}\text{C}$  HMBC of compound **4d**

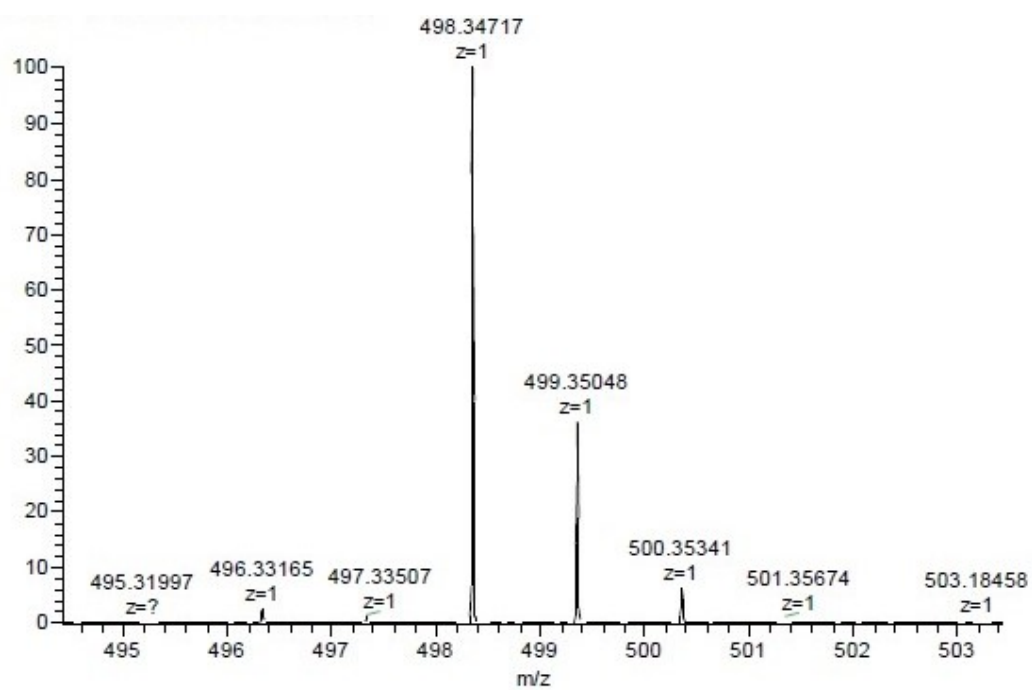

**Fig S51.** HRMS of compound **4d**

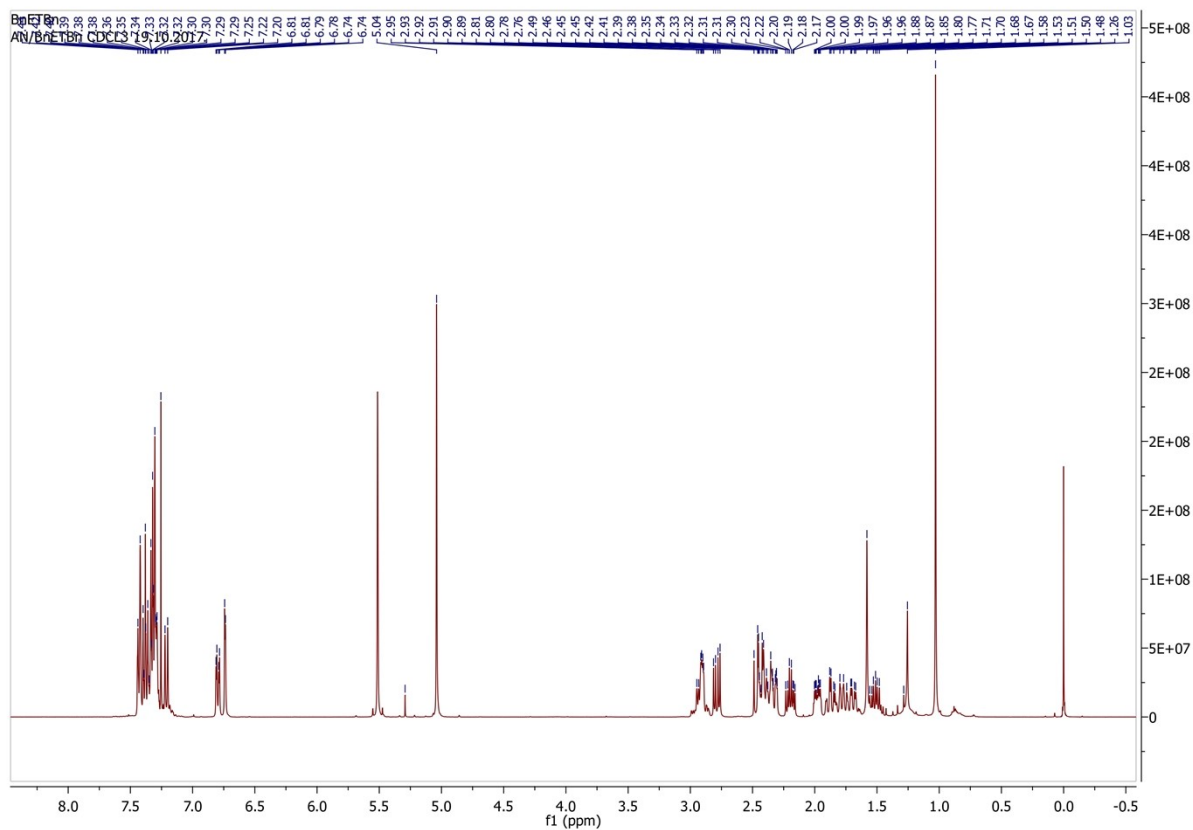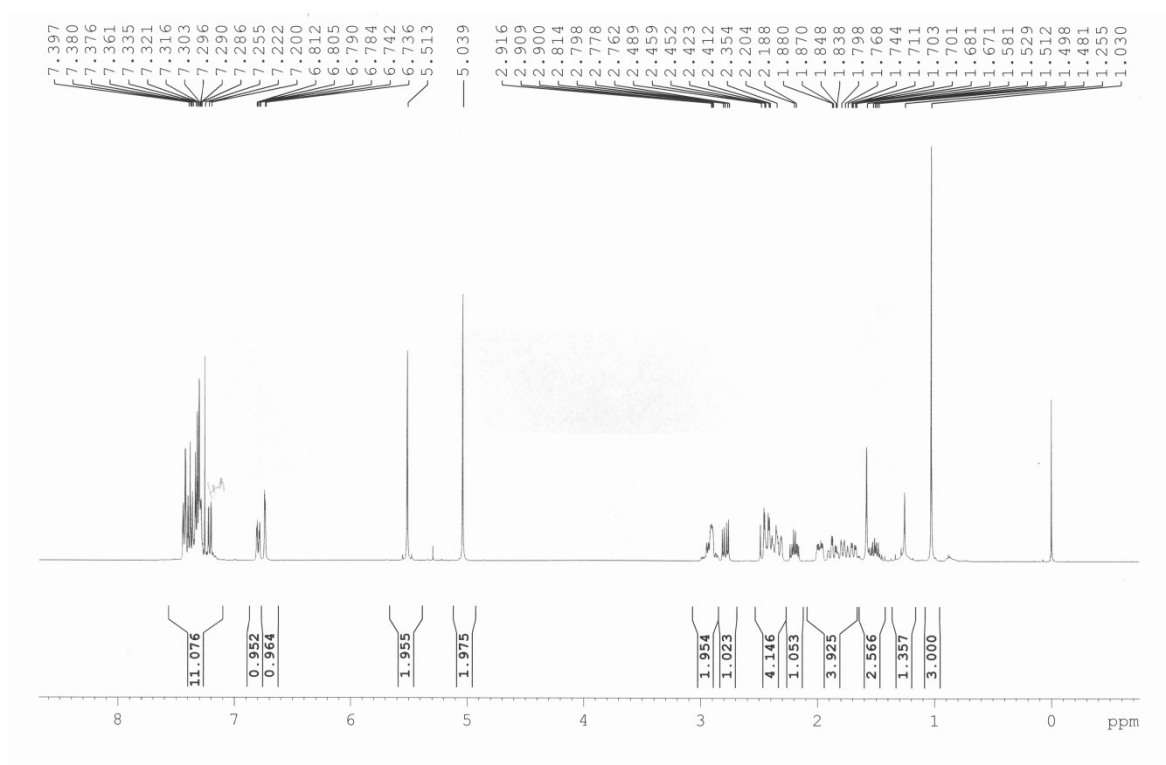

Fig S52. <sup>1</sup>H NMR of compound 4e

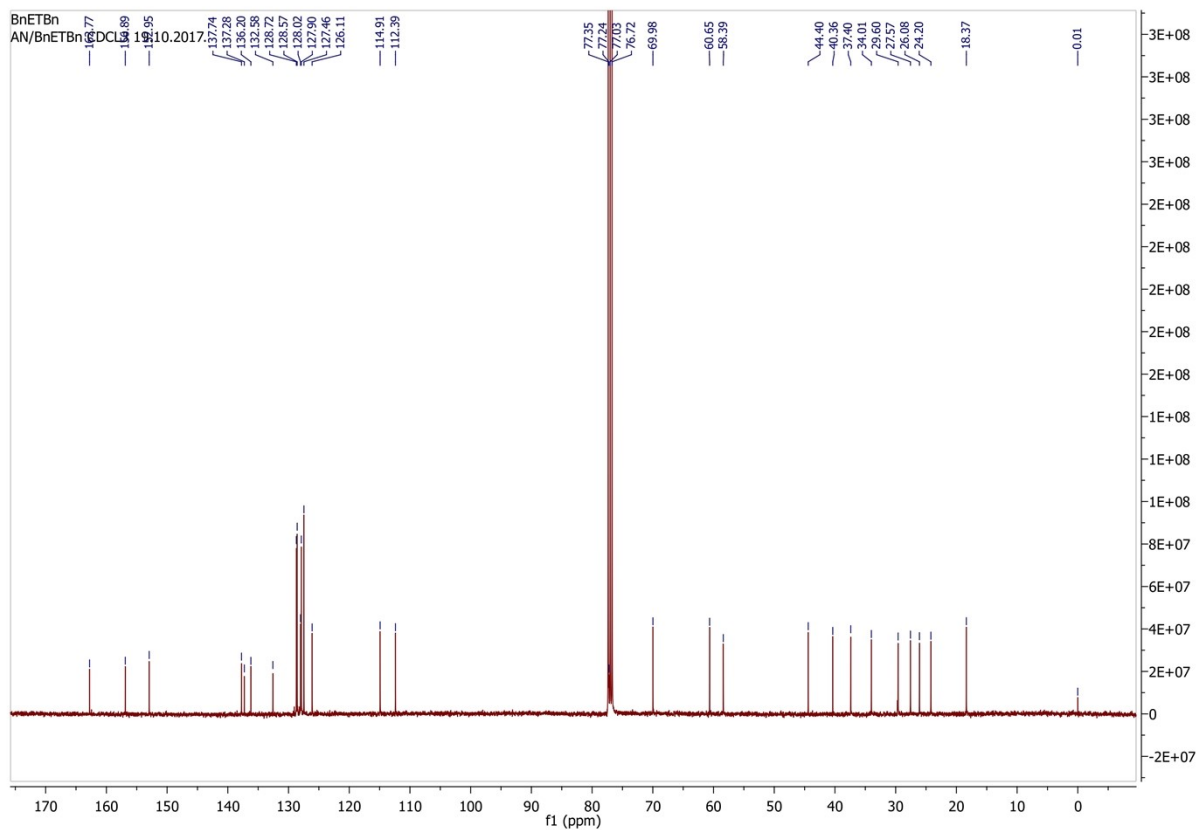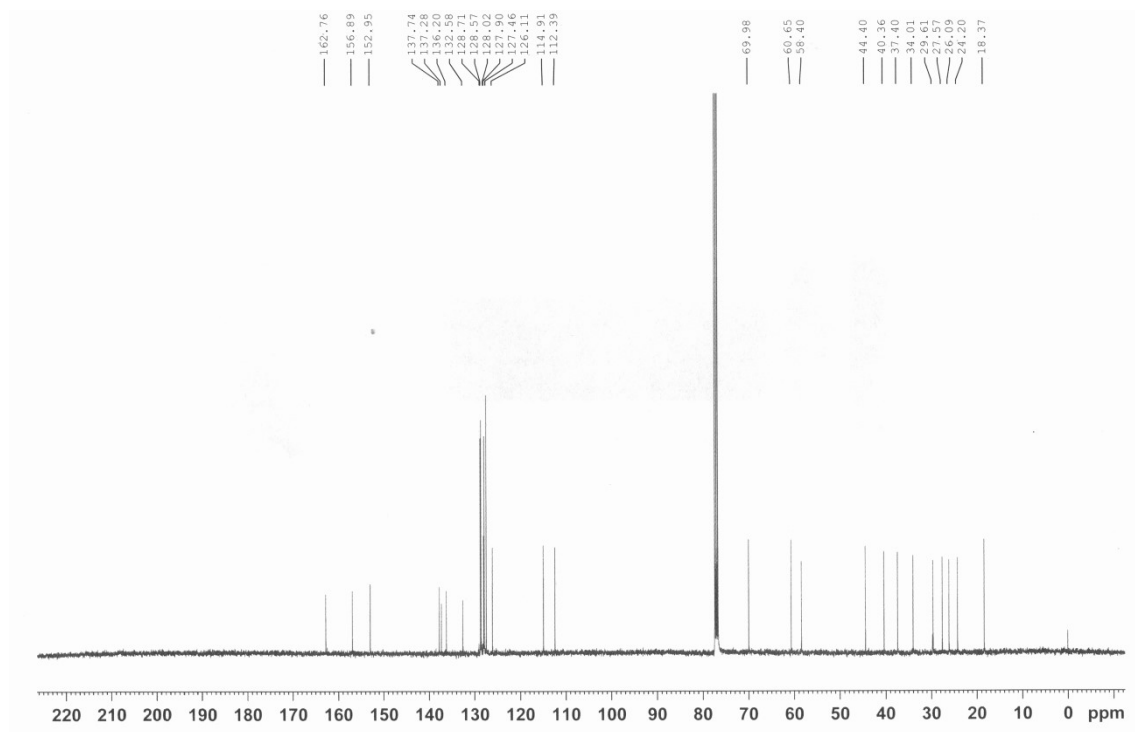

Fig S53. <sup>13</sup>C NMR of compound 4e

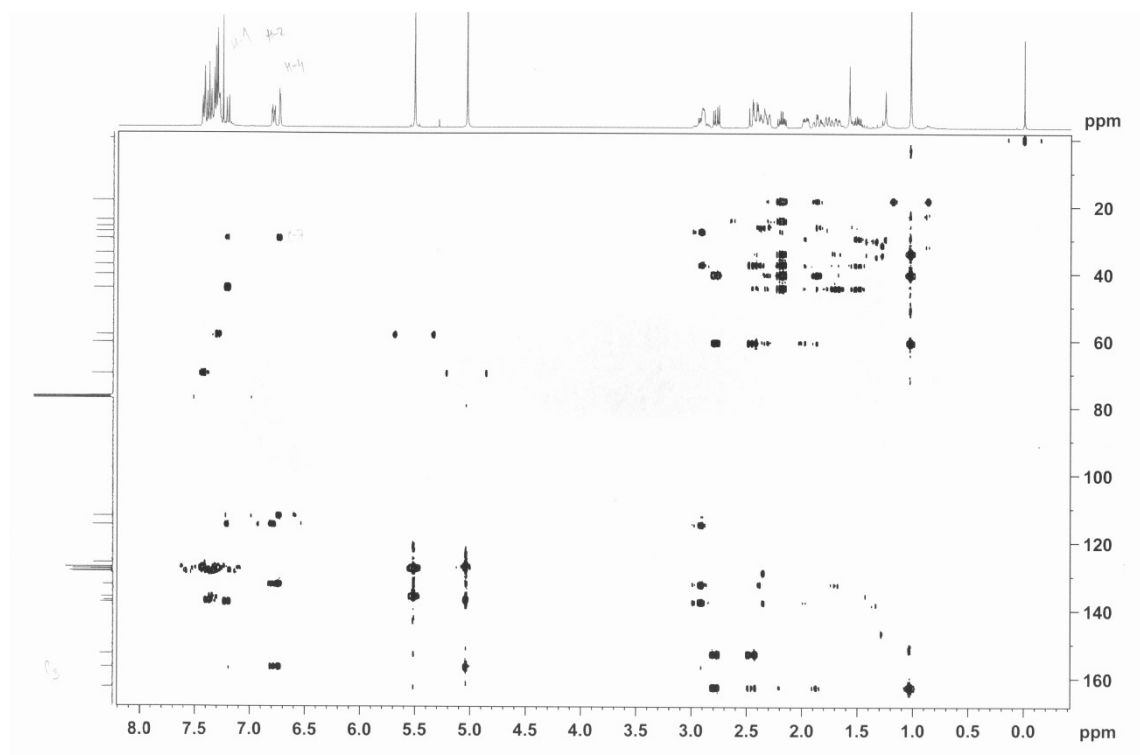

**Fig S54.**  $^1\text{H}$ - $^{13}\text{C}$  HMBC of compound 4e

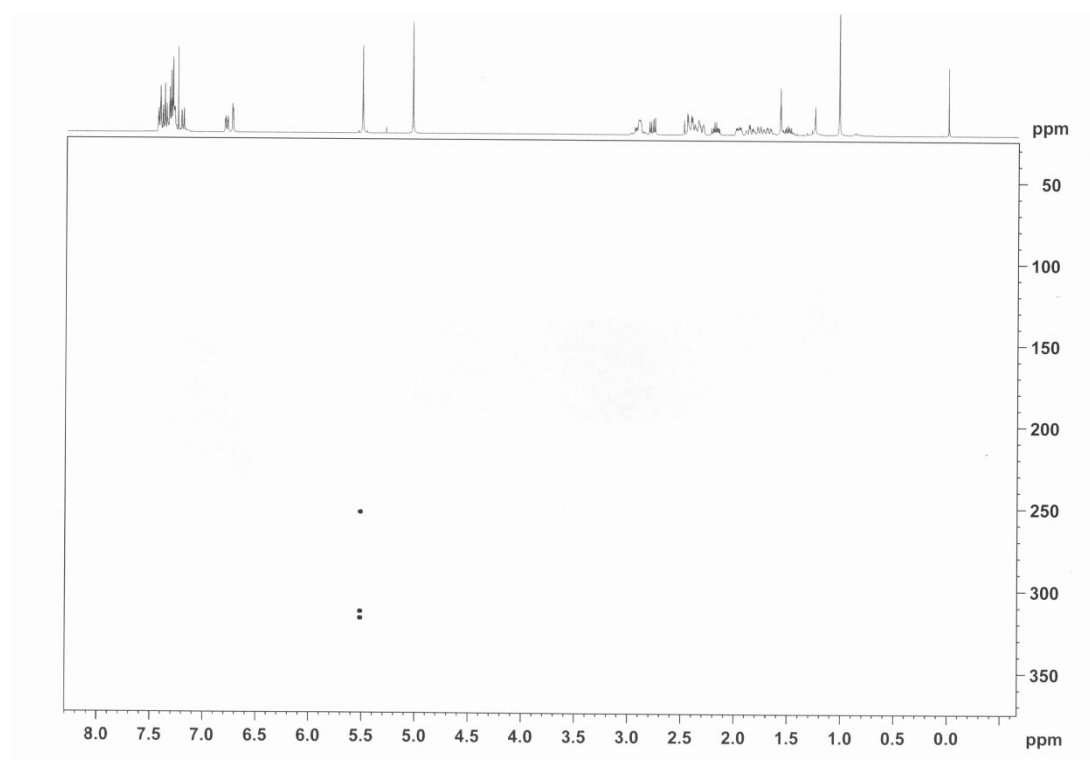

**Fig S55.**  $^1\text{H}$ - $^{15}\text{N}$  HMBC of compound 4e



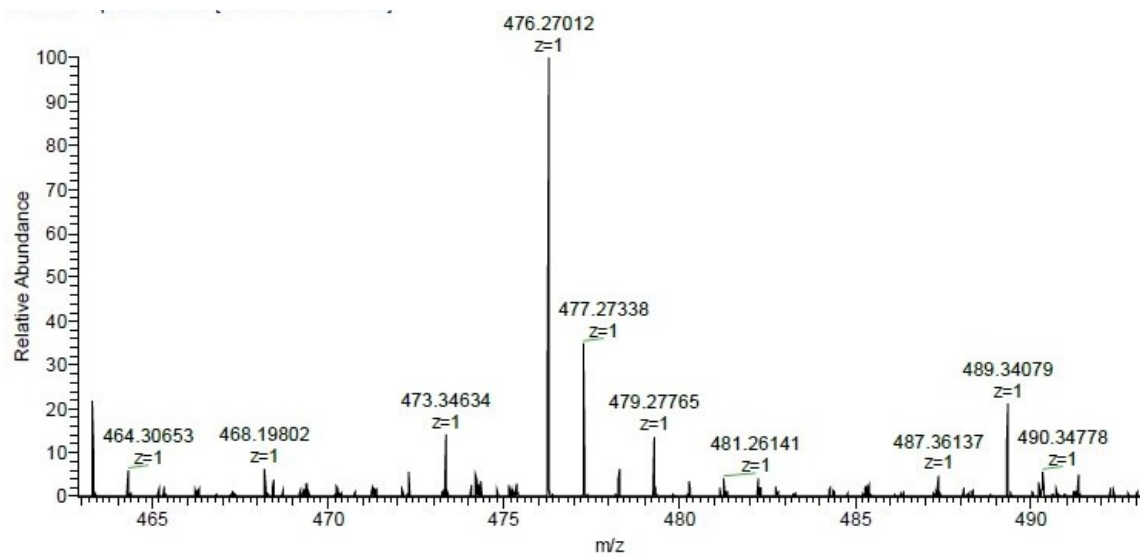

**Fig S56.** HRMS of compound **4e**

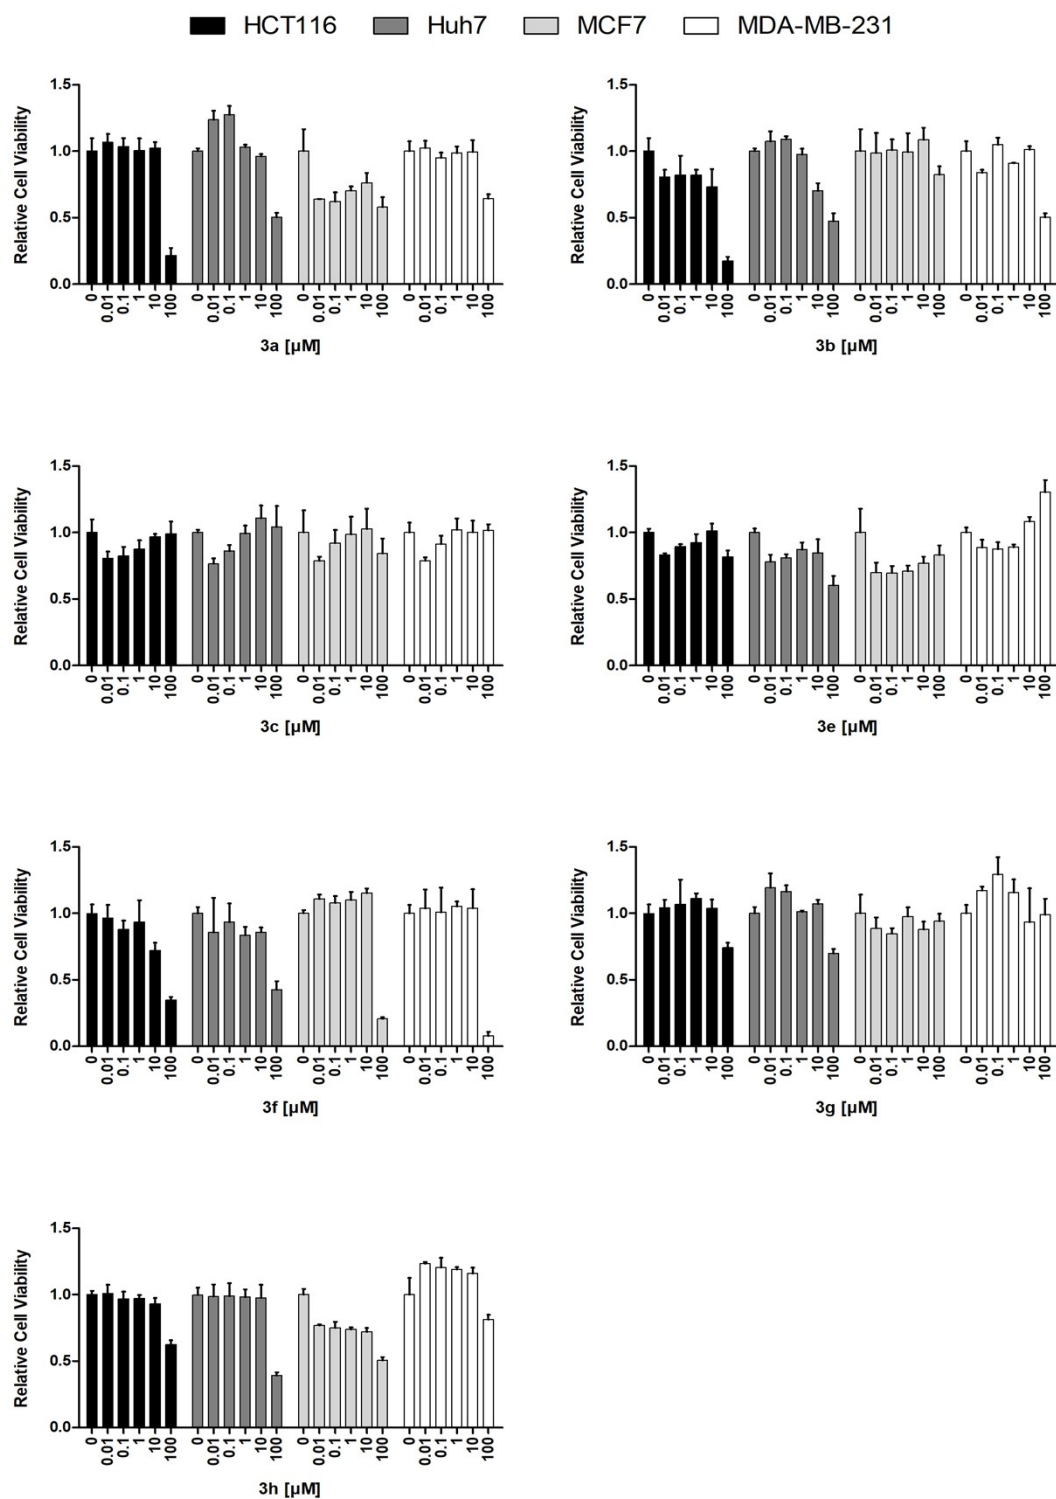

**Fig S57.** Cell viability assays with compounds **3a-c**, **3e-h** in indicated human cancer cell lines

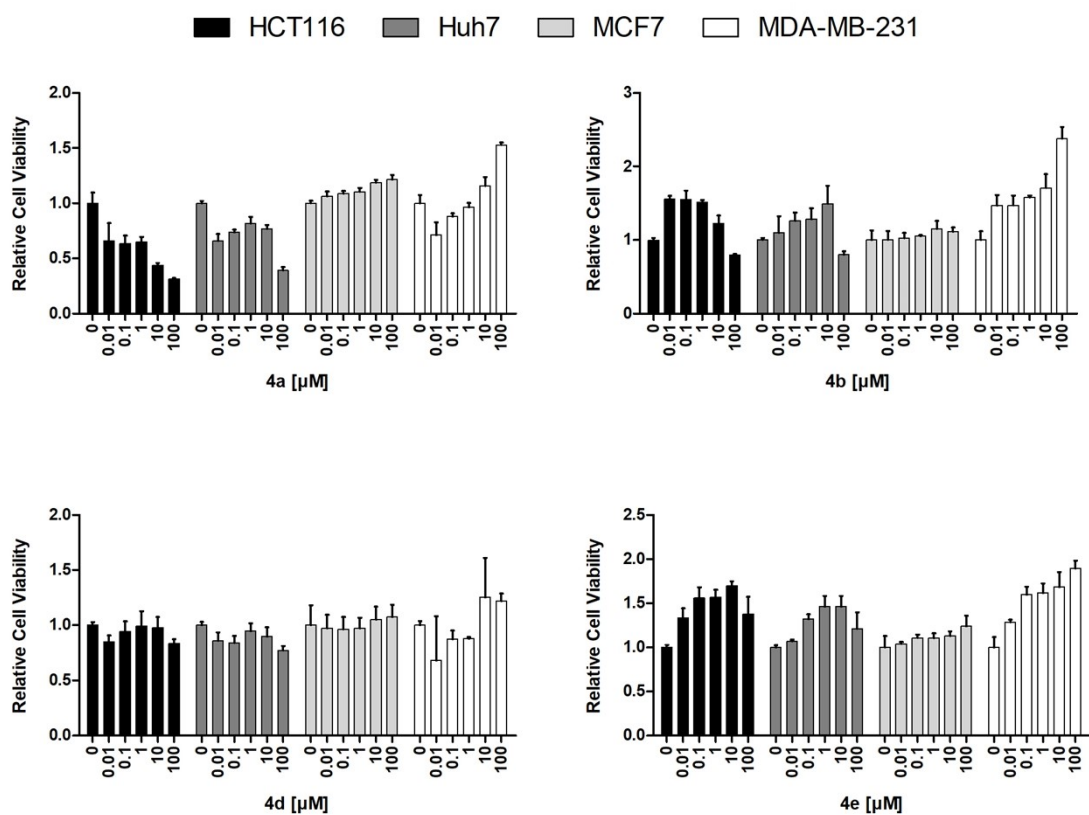

**Fig S58.** Cell viability assays with compounds **4a-b**, **4d-e** in indicated human cancer cell lines.

**Table S1.** IC<sub>50</sub> values [μM] of compound **3f** in indicated cancer cells lines.

| Cell line  | IC <sub>50</sub> of compound 3f [μM] |
|------------|--------------------------------------|
| HCT116     | 22.3                                 |
| Huh7       | 93.6                                 |
| MCF7       | 33.9                                 |
| MDA-MB-231 | 28.7                                 |

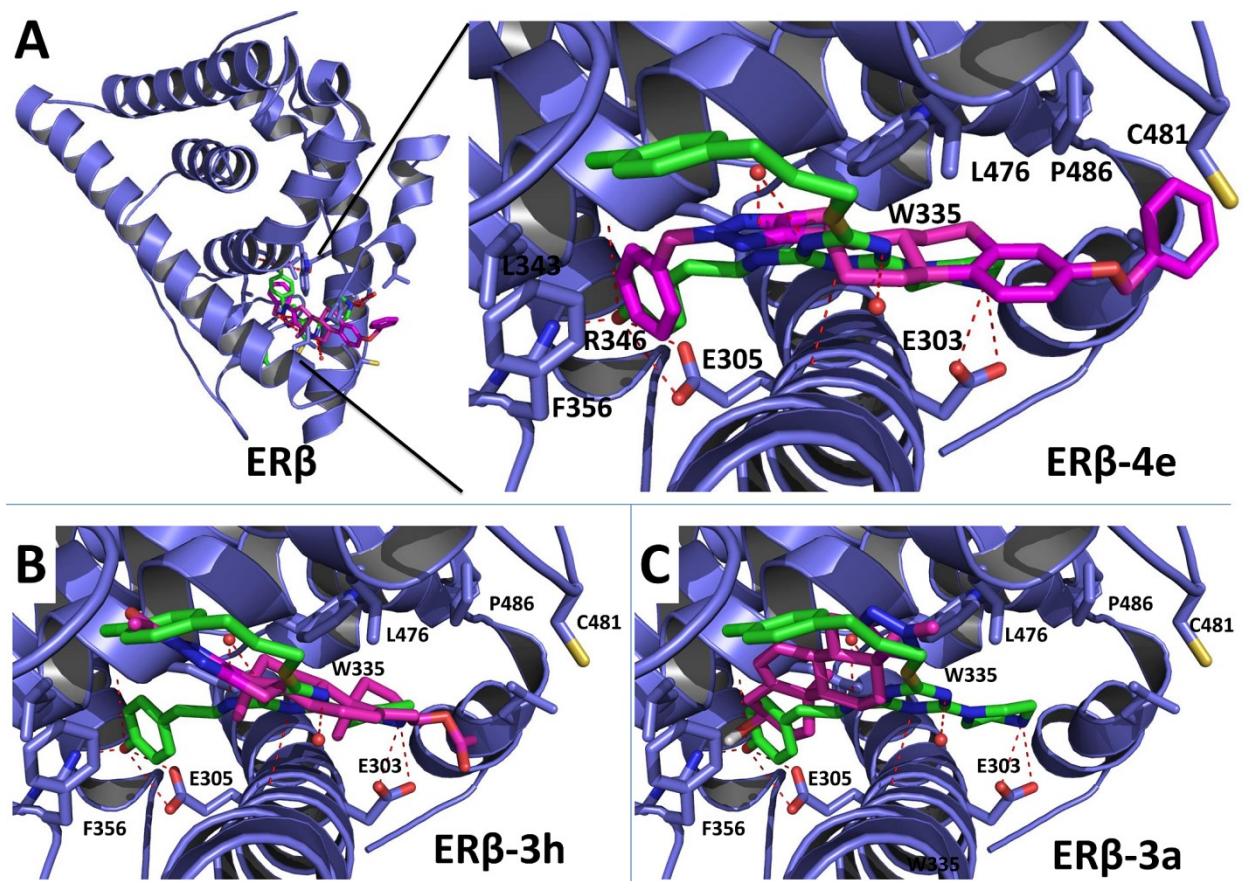

**Figure S59.** Molecular docking of compounds **3a**, **3h** and **4e** against ER $\beta$ -LBD. The top ranking pose predicted for **4e** (magenta sticks) is shown in **panel A**, in the context of the entire receptor (left) and zoomed into the ligand binding site (right). The top ranking docking poses for **3h** and **3a** are shown in **panels B** and **C**, respectively. ER $\beta$  residues involved in ligand binding are labeled. Autodock Vina was used for docking as described in the methods for AKR1C3, but with the following modifications: coordinates from a structure of ER $\beta$  in complex with a 1,3,5-triazine compound (PDB 1NDE) were used as receptor [1]. Docking simulations were centered on the ER $\beta$  active site ( $x=110.144$ ,  $y=8.060$ ,  $z=-108.215$ ) with an exhaustiveness setting of 16. Based on molecular docking, compounds **4e**, **3h** and **3a** could bind in a similar position as the 1,3,5-triazine compound present in the X-ray structure (green sticks), with the exception that **3a** is rotated in comparison with **4e** and **3h**. Binding energies predicted

by docking for 4e (-10.5 kcal/mol), 3h(-8.5 kcal/mol) and 3a (-10.0 kcal.mol) are energetically favorable, suggesting that they have affinity for ER $\beta$  LBD, in agreement with experimental results from the yeast cell fluorescence assay shown in Figure 1.

1. Henke BR, Consler TG, Go N, Hale RL, Hohman DR, Jones SA, Lu AT, Moore LB, Moore JT, Orband-Miller LA, Robinett RG, Shearin J, Spearing PK, Stewart EL, Turnbull PS, Weaver SL, Williams SP, Wisely GB, Lambert MH. A new series of estrogen receptor modulators that display selectivity for estrogen receptor beta. *J Med Chem.* 2002;45(25):5492-505.
